# Supplementary material for: Characterization of the Δ7 Mutant of Cupriavidus metallidurans with Deletions of Seven Secondary Metal Uptake Systems
Source: PubMed Central journal article supplement (PMC5069749; doi:10.1128/msystems.00004-16), 2016-02-25
Supplement: sys001162005st1.pdf [file sys001162005st1.pdf]

Supplementary Table S1. Comparison of the transcriptomes of the strains AE104,  $\Delta$ zupT and  $\Delta$ 7.

For the gene array experiment, strain  $\Delta$ 7,  $\Delta$ zupT and AE104 parent were cultivated in TMM including 50  $\mu$ M EDTA or 10  $\mu$ M Zn(II) RNA was isolated, reversely transcribed and used in a gene array experiment. 3 biological replicates for AE104 and  $\Delta$ 7, two for  $\Delta$ zupT. Ratios Q of the mean values and D values given. Differences were counted as significant if  $(Q > 2 \text{ or } Q < 0.5) \text{ AND } (D > 1)$ .

Up-regulated Q values in green, down-regulated in red, bold of  $D > 1$ , italic if not.

Protein numbers per cell from Herzberg et al., (2014) Metallomics 6, 2157-2165. NeF, never found; NF, not found in the respective strain; NQ, could not be quantified

Comparisons: Ratios Q of the mean gene array signal strain 1/strain 2, 50  $\mu$ M EDTA or 10  $\mu$ M Zn(II).

|                                                                                |          | D values of the Q values in the respective left row: $D = \text{ABS}(Q1-Q2)/(\text{Stabw1}+\text{Stabw2})$ |                           |                  |                  |          |              |           |                   |               |                                                                             |
|--------------------------------------------------------------------------------|----------|------------------------------------------------------------------------------------------------------------|---------------------------|------------------|------------------|----------|--------------|-----------|-------------------|---------------|-----------------------------------------------------------------------------|
| Replicor                                                                       | OpRegion | Q(EDTA)                                                                                                    | Q(Zn)                     | Q(EDTA)          | Q(Zn)            | Q(AE104) | Gene         | Name      | Proteins per cell |               | Description                                                                 |
| Rep                                                                            | OpRegion | $\Delta$ 7/ $\Delta$ zupT                                                                                  | $\Delta$ 7/ $\Delta$ zupT | $\Delta$ 7/AE104 | $\Delta$ 7/AE104 | EDTA/Zn  |              |           | AE104             | $\Delta$ zupT |                                                                             |
| <b>I. Up-regulated in Q(EDTA:<math>\Delta</math>7/<math>\Delta</math>zupT)</b> |          |                                                                                                            |                           |                  |                  |          |              |           |                   |               |                                                                             |
| <b>IA. Up in EDTA, Up in Zn(II)</b>                                            |          |                                                                                                            |                           |                  |                  |          |              |           |                   |               |                                                                             |
| Rep1                                                                           | Op0373f  | 3.46                                                                                                       | 2.59                      | 1.01             | 1.25             | 1.06     | -            | Rmet_1301 | 354               | NF/NF         | Q1LNW1 Integrase, catalytic region                                          |
| Rep1                                                                           | Op0708r  | 2.39                                                                                                       | 4.42                      | 2.49             | 4.46             | 1.13     | -            | Rmet_2556 | NeF               | NeF           | Q1LK93 Integrase, catalytic region                                          |
| Rep1                                                                           | Op0734r  | 2.65                                                                                                       | 2.40                      | 0.93             | 0.74             | 1.16     | <i>zupT</i>  | Rmet_2621 | NeF               | NeF           | Q1LK28 Zinc/iron permease                                                   |
| Rep1                                                                           | Op0810r  | 2.20                                                                                                       | 2.91                      | 1.62             | 2.49             | 0.69     | -            | Rmet_2882 | NeF               | NeF           | Q1LJC1 Putative uncharacterized protein                                     |
| Rep1                                                                           | Op0811f  | 2.07                                                                                                       | 2.28                      | 1.40             | 1.69             | 0.72     | -            | Rmet_2883 | NeF               | NeF           | Q1LJC0 RNA-directed DNA polymerase                                          |
| Rep1                                                                           | Op0860r  | 3.10                                                                                                       | 6.72                      | 2.93             | 7.44             | 1.10     | <i>mtgA</i>  | Rmet_3053 | 34                | NF/NF         | Q1LIV1 Monofunctional biosynthetic peptidoglycan transglycosylase           |
| <b>Environmental Information Processing</b>                                    |          |                                                                                                            |                           |                  |                  |          |              |           |                   |               |                                                                             |
| <b>Membrane Transport</b>                                                      |          |                                                                                                            |                           |                  |                  |          |              |           |                   |               |                                                                             |
| <b>ABC transporters [PATH:ko02010]</b>                                         |          |                                                                                                            |                           |                  |                  |          |              |           |                   |               |                                                                             |
| Rep1                                                                           | Op0895f  | 2.72                                                                                                       | 6.47                      | 2.23             | 5.39             | 0.96     | -            | Rmet_3185 | NeF               | NeF           | Q1LIG9 Binding-protein-dependent transport systems inner membrane component |
| Rep1                                                                           | Op0895f  | 4.28                                                                                                       | 7.24                      | 3.25             | 5.58             | 0.88     | -            | Rmet_3186 | 283               | 16            | Q1LIG8 ABC transporter-related protein                                      |
| Rep1                                                                           | Op0896r  | 2.18                                                                                                       | 2.31                      | 1.60             | 1.44             | 0.78     | -            | Rmet_3187 | 43                | NF/NF         | Q1LIG7 Putative uncharacterized protein                                     |
| <b>Environmental Information Processing</b>                                    |          |                                                                                                            |                           |                  |                  |          |              |           |                   |               |                                                                             |
| <b>Cell Motility</b>                                                           |          |                                                                                                            |                           |                  |                  |          |              |           |                   |               |                                                                             |
| <b>Flagellar assembly [PATH:ko02040]</b>                                       |          |                                                                                                            |                           |                  |                  |          |              |           |                   |               |                                                                             |
| Rep2                                                                           | Op1026f  | 2.19                                                                                                       | 3.02                      | 1.79             | 2.51             | 2.01     | <i>flhD2</i> | Rmet_3685 | 17                | NF/NF         | Q1LH19 Flagellar transcriptional activator                                  |
| Rep2                                                                           | Op1026f  | 2.07                                                                                                       | 2.32                      | 1.92             | 1.97             | 2.16     | <i>flhC2</i> | Rmet_3686 | NeF               | NeF           | Q1LH18 Flagellar transcriptional activator FlhC                             |
| Rep2                                                                           | Op1026f  | 2.27                                                                                                       | 2.61                      | 1.90             | 2.25             | 2.36     | <i>motA</i>  | Rmet_3687 | NeF               | NeF           | Q1LH17 Chemotaxis MotA protein                                              |
| Rep2                                                                           | Op1026f  | 2.43                                                                                                       | 2.62                      | 1.42             | 1.38             | 1.44     | <i>flhG</i>  | Rmet_3701 | NeF               | NeF           | Q1LH03 Flagellar biosynthesis protein FlhG                                  |
| Rep2                                                                           | Op1042f  | 2.23                                                                                                       | 2.02                      | 1.18             | 1.35             | 1.93     | <i>flgF</i>  | Rmet_3738 | NF/NF             | 101           | Q1LGW6 Flagellar basal-body rod FlgF                                        |
| Rep2                                                                           | Op1090f  | 3.20                                                                                                       | 8.49                      | 2.97             | 7.19             | 0.87     | -            | Rmet_3902 | 1190              | 1384          | Q1LGF6 Short-chain dehydrogenase/reductase SDR                              |
| Rep2                                                                           | Op1162f  | 2.02                                                                                                       | 3.61                      | 1.80             | 3.44             | 1.09     | -            | Rmet_4125 | NF/NF             | NF/NF         | Q1LFT4 Putative uncharacterized protein                                     |
| Rep2                                                                           | Op1324f  | 2.54                                                                                                       | 3.35                      | 0.79             | 0.95             | 1.34     | -            | Rmet_4603 | 123               | 3703          | Q1LEG1 Transcriptional regulator, GntR family                               |
| Rep2                                                                           | Op1324f  | 2.26                                                                                                       | 2.66                      | 0.46             | 0.68             | 2.10     | -            | Rmet_4604 | NeF               | NeF           | Q1LEG0 Putative uncharacterized protein                                     |
| Rep2                                                                           | Op1326f  | 2.26                                                                                                       | 2.14                      | 1.26             | 1.22             | 1.41     | <i>metY</i>  | Rmet_4606 | 2698              | 174           | Q1LEF8 O-acetylhomoserine/O-acetylserine sulfhydrylase                      |
| Rep2                                                                           | Op1330f  | 2.09                                                                                                       | 2.29                      | 1.00             | 1.00             | 0.98     | -            | Rmet_4616 | NF/NF             | 154           | Q1LEE8 Putative uncharacterized protein                                     |
| Rep2                                                                           | Op1411r  | 2.20                                                                                                       | 2.47                      | 1.34             | 1.38             | 0.57     | -            | Rmet_4836 | NeF               | NeF           | Q1LDS8 Diguanylate phosphodiesterase (EAL domain)                           |
| Rep2                                                                           | Op1596f  | 2.30                                                                                                       | 2.62                      | 1.36             | 1.35             | 0.56     | -            | Rmet_5365 | NeF               | NeF           | Q1LCA2 Transcriptional regulator, LysR family                               |
| Rep2                                                                           | Op1799r  | 3.55                                                                                                       | 5.15                      | 3.26             | 5.11             | 1.08     | -            | Rmet_5924 | 63                | NF/NF         | Q1LAP3 SlyX                                                                 |
| Rep2                                                                           | Op1799r  | 6.44                                                                                                       | 11.87                     | 6.48             | 11.19            | 1.06     | -            | Rmet_5925 | 396               | 572           | Q1LAP2 3-demethylubiquinone-9 3-methyltransferase                           |
| <b>IB. Up in EDTA, down in Zn(II)</b>                                          |          |                                                                                                            |                           |                  |                  |          |              |           |                   |               |                                                                             |
| Rep1                                                                           | Op0638r  | 6.94                                                                                                       | 0.42                      | 6.63             | 0.11             | 0.14     | -            | Rmet_2228 | NF/NF             | NF/NF         | Q1LL69 Putative uncharacterized protein                                     |
| Rep1                                                                           | Op0663f  | 2.32                                                                                                       | 0.36                      | 1.92             | 1.91             | 1.02     | -            | Rmet_2345 | NeF               | NeF           | Q8GQ55 Putative uncharacterized protein ORF C55                             |
| <b>IC. Up in EDTA, no change in Zn(II)</b>                                     |          |                                                                                                            |                           |                  |                  |          |              |           |                   |               |                                                                             |
| Rep1                                                                           | Op0002r  | 2.23                                                                                                       | 1.07                      | 1.92             | 0.42             | 0.50     | -            | Rmet_0008 | 11                | NF/NF         | Q1LSI2 Binding-protein-dependent transport systems inner membrane component |
| Rep1                                                                           | Op0036r  | 5.32                                                                                                       | 0.83                      | 4.03             | 0.14             | 0.19     | <i>regA</i>  | Rmet_0135 | 522               | 479           | Q1LS55 Response regulator receiver domain protein (CheY-like)               |
| Rep1                                                                           | Op0066r  | 2.97                                                                                                       | 1.05                      | 2.96             | 0.40             | 0.34     | -            | Rmet_0221 | NeF               | NeF           | Q1LRW9 Putative uncharacterized protein                                     |

|      |         |      |      |      |      |                   |           |       |       |        |                                                                      |
|------|---------|------|------|------|------|-------------------|-----------|-------|-------|--------|----------------------------------------------------------------------|
| Rep1 | Op0096r | 3.08 | 0.93 | 2.84 | 0.31 | 0.34 -            | Rmet_0343 | 184   | 224   | Q1LRJ7 | Transcriptional regulator, RpiR family                               |
| Rep1 | Op0118r | 2.37 | 1.02 | 2.05 | 0.40 | 0.40 -            | Rmet_0455 | NeF   | NeF   | Q1LR85 | Cl-channel, voltage gated                                            |
| Rep1 | Op0140r | 2.46 | 0.75 | 2.19 | 0.45 | 0.47 -            | Rmet_0522 | 105   | 174   | Q1LR18 | Putative uncharacterized protein                                     |
| Rep1 | Op0162r | 2.45 | 1.23 | 2.27 | 0.45 | 0.43 -            | Rmet_0576 | NeF   | NeF   | Q1LQW4 | Fimbrial protein                                                     |
| Rep1 | Op0172r | 2.32 | 0.78 | 2.18 | 0.38 | 0.47 -            | Rmet_0607 | 198   | 212   | Q1LQT3 | Hydroxymethylglutaryl-CoA lyase                                      |
| Rep1 | Op0179f | 2.62 | 1.14 | 2.47 | 0.44 | 0.47 -            | Rmet_0626 | NF/NF | 602   | Q1LQR4 | Rhs element Vgr protein                                              |
| Rep1 | Op0180r | 2.31 | 1.19 | 1.67 | 0.47 | 0.60 -            | Rmet_0650 | NeF   | NeF   | Q1LQP0 | Peptidase A24A, prepilin type IV                                     |
| Rep1 | Op0184r | 2.62 | 0.88 | 2.47 | 0.37 | 0.36 -            | Rmet_0664 | 38    | NF/NF | Q1LQM6 | Putative uncharacterized protein                                     |
| Rep1 | Op0211f | 2.07 | 0.88 | 0.92 | 0.45 | 0.98 -            | Rmet_0745 | NeF   | NeF   | Q1LQE5 | Putative uncharacterized protein                                     |
| Rep1 | Op0220r | 2.20 | 1.15 | 1.96 | 0.49 | 0.51 <i>phnE</i>  | Rmet_0773 | NeF   | NeF   | Q1LQB7 | Phosphonate uptake transporter                                       |
| Rep1 | Op0299f | 3.01 | 1.00 | 2.72 | 0.50 | 0.35 <i>lolE</i>  | Rmet_1040 | 576   | 47    | Q1LPK0 | Lipoprotein releasing system, transmembrane protein, LolC/E family   |
| Rep1 | Op0325f | 2.09 | 1.17 | 1.65 | 0.72 | 0.49 -            | Rmet_1139 | NeF   | NeF   | Q1LPA1 | Major facilitator superfamily MFS_1                                  |
| Rep1 | Op0362r | 2.07 | 1.42 | 0.93 | 0.94 | 1.08 -            | Rmet_1251 | NQ/NQ | NF/NF | Q1LNY9 | Putative uncharacterized protein                                     |
| Rep1 | Op0370r | 2.07 | 1.05 | 1.90 | 0.43 | 0.49 <i>hoxG</i>  | Rmet_1297 | NF/NF | NF/NF | Q1LNU4 | Nickel-dependent hydrogenase, large subunit                          |
| Rep1 | Op0386r | 2.04 | 0.96 | 1.98 | 0.44 | 0.49 -            | Rmet_1386 | NeF   | NeF   | Q1LTK7 | Putative uncharacterized protein                                     |
| Rep1 | Op0397f | 2.44 | 1.13 | 2.04 | 0.58 | 0.44 <i>dppB1</i> | Rmet_1409 | 35    | NF/NF | Q1LNI4 | Binding-protein-dependent transport systems inner membrane component |
| Rep1 | Op0485f | 2.37 | 1.07 | 2.10 | 0.45 | 0.47 <i>tauD</i>  | Rmet_1717 | 15    | NF/NF | Q1LMM8 | Taurine catabolism dioxygenase TauD/TfdA                             |
| Rep1 | Op0492r | 3.04 | 1.06 | 2.29 | 0.27 | 0.40 -            | Rmet_1734 | NeF   | NeF   | Q1LML3 | Putative uncharacterized protein                                     |
| Rep1 | Op0587f | 2.16 | 1.12 | 1.83 | 0.46 | 0.53 -            | Rmet_2006 | NeF   | NeF   | Q1LLU1 | Putative uncharacterized protein                                     |
| Rep1 | Op0663f | 2.07 | 1.21 | 1.20 | 0.62 | 0.70 -            | Rmet_2350 | NeF   | NeF   | Q8GQ60 | Putative uncharacterized protein ORF C50                             |
| Rep1 | Op0664r | 2.20 | 0.76 | 0.87 | 0.34 | 1.06 -            | Rmet_2361 | NeF   | NeF   | Q8GQ71 | Putative uncharacterized protein ORF C39                             |
| Rep1 | Op0688r | 2.00 | 0.74 | 1.32 | 0.60 | 0.70 -            | Rmet_2461 | NeF   | NeF   | Q1LK18 | Colicin V production protein                                         |
| Rep1 | Op0696r | 2.34 | 0.94 | 2.11 | 0.42 | 0.46 -            | Rmet_2518 | NeF   | NeF   | Q1LKD1 | Chromate transporter                                                 |
| Rep1 | Op0754r | 2.39 | 1.07 | 2.31 | 0.44 | 0.46 -            | Rmet_2661 | NeF   | NeF   | Q1LJZ2 | Putative uncharacterized protein                                     |
| Rep1 | Op0776r | 8.63 | 1.07 | 8.03 | 0.83 | 0.81 -            | Rmet_2759 | NeF   | NeF   | Q1LJP4 | Putative lipoprotein                                                 |
| Rep1 | Op0780r | 2.94 | 1.08 | 2.40 | 0.35 | 0.47 -            | Rmet_2775 | 36    | NF/NF | Q1LJM8 | PepSY-associated TM helix                                            |
| Rep1 | Op0788r | 2.96 | 0.75 | 2.13 | 0.27 | 0.43 -            | Rmet_2802 | 60    | NF/NF | Q1LJK1 | Prolipoprotein diacylglycerol transferase                            |
| Rep1 | Op0848r | 3.89 | 1.19 | 3.49 | 0.25 | 0.28 -            | Rmet_3025 | NeF   | NeF   | Q1LIX8 | Putative uncharacterized protein                                     |
| Rep1 | Op0956r | 2.09 | 1.01 | 1.94 | 0.74 | 0.83 -            | Rmet_3439 | NeF   | NeF   | Q1LHR5 | GCN5-related N-acetyltransferase                                     |
| Rep1 | Op0959f | 4.42 | 0.95 | 4.72 | 0.21 | 0.22 <i>dctA2</i> | Rmet_3444 | NeF   | NeF   | Q1LHR0 | Sodium:dicarboxylate symporter                                       |

| Cellular Processes |         | Cell Motility |      |      | Bacterial chemotaxis [PATH:ko02030] |                  |           |       |       |        |                                        |
|--------------------|---------|---------------|------|------|-------------------------------------|------------------|-----------|-------|-------|--------|----------------------------------------|
| Rep2               | Op1026f | 2.87          | 1.22 | 2.32 | 0.48                                | 0.46 -           | Rmet_3679 | 177   | NF/NF | Q1LH25 | Diguanylate cyclase/phosphodiesterase  |
| Rep2               | Op1026f | 2.14          | 1.56 | 1.12 | 1.07                                | 1.88 <i>cheW</i> | Rmet_3681 | 92    | NF/NF | Q1LH23 | CheW protein                           |
| Rep2               | Op1026f | 2.56          | 1.77 | 1.41 | 1.12                                | 1.77 -           | Rmet_3684 | NF/NF | 207   | Q1LH20 | Putative uncharacterized protein       |
| Rep2               | Op1026f | 2.02          | 1.78 | 1.49 | 1.38                                | 2.10 <i>cheW</i> | Rmet_3690 | 93    | NF/NF | Q1LH14 | CheW protein                           |
| Rep2               | Op1026f | 2.14          | 1.73 | 1.49 | 1.20                                | 1.65 <i>cheR</i> | Rmet_3691 | NeF   | NeF   | Q1LH13 | MCP methyltransferase, CheR-type       |
| Rep2               | Op1026f | 2.05          | 1.68 | 1.53 | 1.44                                | 1.83 <i>cheZ</i> | Rmet_3695 | 187   | 374   | Q1LH09 | Chemotaxis phosphatase, CheZ           |
| Rep2               | Op1026f | 2.93          | 1.51 | 1.97 | 0.55                                | 0.63 <i>fliA</i> | Rmet_3702 | NeF   | NeF   | Q1LH02 | RNA polymerase sigma factor            |
| Rep2               | Op1042f | 2.05          | 1.84 | 1.02 | 1.40                                | 2.37 <i>flgB</i> | Rmet_3734 | 145   | NF/NF | Q1LGX0 | Flagellar basal-body rod protein FlgB  |
| Rep2               | Op1042f | 2.08          | 1.73 | 1.04 | 1.23                                | 2.19 <i>flgC</i> | Rmet_3735 | NeF   | NeF   | Q1LW99 | Flagellar basal-body rod protein FlgC  |
| Rep2               | Op1047r | 2.52          | 1.04 | 2.28 | 0.35                                | 0.43 <i>alkA</i> | Rmet_3766 | NeF   | NeF   | Q1LGT8 | Putative uncharacterized protein       |
| Rep2               | Op1053r | 2.86          | 1.05 | 2.61 | 0.34                                | 0.38 <i>lipA</i> | Rmet_3796 | NeF   | NeF   | Q1LGR0 | Alpha/beta hydrolase fold              |
| Rep2               | Op1057r | 2.16          | 1.23 | 2.07 | 0.46                                | 0.46 -           | Rmet_3801 | 297   | 7     | Q1LQG5 | Uncharacterized protein UPF0065        |
| Rep2               | Op1066f | 2.02          | 1.37 | 1.93 | 0.49                                | 0.44 -           | Rmet_3841 | NeF   | NeF   | Q1LGL7 | Tannase and feruloyl esterase          |
| Rep2               | Op1082f | 2.22          | 0.97 | 2.19 | 0.51                                | 0.46 -           | Rmet_3883 | NeF   | NeF   | Q1LGH5 | Putative uncharacterized protein       |
| Rep2               | Op1125r | 2.27          | 0.89 | 1.99 | 0.39                                | 0.47 -           | Rmet_4007 | NeF   | NeF   | Q1LGS1 | Putative uncharacterized protein       |
| Rep2               | Op1141r | 2.30          | 1.22 | 1.96 | 0.35                                | 0.41 -           | Rmet_4057 | NeF   | NeF   | Q1LG01 | CcmE/CycJ protein                      |
| Rep2               | Op1143r | 2.34          | 1.20 | 2.25 | 0.64                                | 0.63 -           | Rmet_4070 | 36    | NF/NF | Q1LFY8 | Transcriptional regulator, LysR family |
| Rep2               | Op1165r | 8.17          | 1.00 | 5.65 | 0.13                                | 0.18 <i>pdhA</i> | Rmet_4134 | NeF   | NeF   | Q1LFS5 | Dehydrogenase, E1 component            |
| Rep2               | Op1170f | 2.07          | 1.15 | 1.54 | 0.51                                | 0.59 -           | Rmet_4157 | 72    | NF/NF | Q1LFQ2 | Putative lipoprotein                   |
| Rep2               | Op1175r | 2.76          | 1.16 | 1.86 | 0.39                                | 0.56 -           | Rmet_4173 | NeF   | NeF   | Q1LFN6 | Putative uncharacterized protein       |

|      |         |      |      |      |      |        |           |     |       |        |                                               |
|------|---------|------|------|------|------|--------|-----------|-----|-------|--------|-----------------------------------------------|
| Rep2 | Op1204f | 2.51 | 1.20 | 2.13 | 0.41 | 0.44 - | Rmet_4251 | NeF | NeF   | Q1LFF9 | Pili assembly chaperone                       |
| Rep2 | Op1257r | 2.16 | 0.95 | 2.01 | 0.38 | 0.42 - | Rmet_4411 | NeF | NeF   | Q1LF00 | CoA-binding                                   |
| Rep2 | Op1263r | 4.83 | 1.01 | 3.84 | 0.19 | 0.22 - | Rmet_4437 | NeF | NeF   | Q1LEX4 | Putative uncharacterized protein              |
| Rep2 | Op1271r | 5.82 | 0.99 | 4.13 | 0.24 | 0.20 - | Rmet_4461 | NeF | NeF   | Q1LEV0 | Putative uncharacterized protein              |
| Rep2 | Op1278f | 2.04 | 1.30 | 1.84 | 0.52 | 0.51 - | Rmet_4483 | 14  | NF/NF | Q1LES8 | Phenylacetic acid degradation-related protein |
| Rep2 | Op1314f | 2.05 | 1.16 | 0.76 | 1.01 | 1.51 - | Rmet_4565 | 91  | 50    | Q1LEJ9 | TonB-dependent receptor                       |

| Environmental Information Processing |         | Membrane Transport |      | Pores ion channels |      |                   |           |       |       |        |                                        |
|--------------------------------------|---------|--------------------|------|--------------------|------|-------------------|-----------|-------|-------|--------|----------------------------------------|
| Rep2                                 | Op1330f | 3.63               | 1.40 | 1.25               | 0.65 | 8.91 -            | Rmet_4617 | NF/NF | NF/NF | Q1LEE7 | TonB-dependent siderophore receptor    |
| Rep2                                 | Op1331r | 3.50               | 1.61 | 1.15               | 0.75 | 12.11 -           | Rmet_4618 | NeF   | NeF   | Q1LEE6 | Putative uncharacterized protein       |
| Rep2                                 | Op1419r | 3.17               | 0.95 | 3.14               | 0.32 | 0.31 -            | Rmet_4863 | NeF   | NeF   | Q1LDQ1 | Putative uncharacterized protein       |
| Rep2                                 | Op1439r | 3.16               | 0.96 | 3.04               | 0.27 | 0.30 -            | Rmet_4913 | NeF   | NeF   | Q1LDK1 | ABC-type transport system protein      |
| Rep2                                 | Op1540f | 2.14               | 1.20 | 1.62               | 0.54 | 0.60 <i>hipO</i>  | Rmet_5222 | NeF   | NeF   | Q1LCP5 | Peptidase M20D, amidohydrolase         |
| Rep2                                 | Op1544f | 2.11               | 1.55 | 1.17               | 1.16 | 1.47 -            | Rmet_5236 | NeF   | NeF   | Q1LCN1 | DegT/DnrJ/EryC1/StrS aminotransferase  |
| Rep2                                 | Op1550f | 2.57               | 1.39 | 1.03               | 1.02 | 2.57 <i>fliC2</i> | Rmet_5252 | 2179  | 76    | Q1LCL5 | Flagellin-like protein                 |
| Rep2                                 | Op1552f | 2.57               | 0.80 | 1.92               | 0.38 | 0.56 <i>fliK</i>  | Rmet_5266 | NeF   | NeF   | Q1LCK1 | Flagellar hook-length control protein  |
| Rep2                                 | Op1592f | 2.15               | 1.16 | 1.77               | 0.73 | 0.65 -            | Rmet_5359 | NeF   | NeF   | Q1LCA8 | Uncharacterized protein UPF0065        |
| Rep2                                 | Op1619r | 2.94               | 0.80 | 3.03               | 0.39 | 0.40 -            | Rmet_5445 | 59    | NF/NF | Q1LC22 | Carbohydrate kinase, FGGY              |
| Rep2                                 | Op1706f | 10.62              | 0.70 | 8.67               | 0.13 | 0.14 -            | Rmet_5706 | NeF   | NeF   | Q1LBB1 | Putative uncharacterized protein       |
| Rep2                                 | Op1763r | 2.16               | 0.97 | 2.00               | 0.51 | 0.56 <i>pstS1</i> | Rmet_5829 | NeF   | NeF   | Q1LAY8 | Periplasmic phosphate binding protein  |
| Rep2                                 | Op1779r | 110.09             | 1.19 | 95.83              | 1.05 | 1.07 -            | Rmet_5879 | NeF   | NeF   | Q1LAT8 | Transcriptional regulator, LysR family |
| Rep2                                 | Op1783r | 6.39               | 1.07 | 5.43               | 0.20 | 0.20 -            | Rmet_5886 | 147   | NF/NF | Q1LAT1 | OmpW                                   |

## II. Down-regulated in Q(EDTA:Δ7/ΔzupT)

### IIA. Down-regulated in Q(EDTA:Δ7/ΔzupT) AND Down-regulated in Q(Zn:Δ7/ΔzupT) AND (Down-regulated or not-regulated) in Q(Δ7/AE104)

|      |         |      |      |      |      |                   |           |     |     |        |                                    |
|------|---------|------|------|------|------|-------------------|-----------|-----|-----|--------|------------------------------------|
| Rep1 | Op0427f | 0.02 | 0.02 | 0.14 | 0.24 | 1.65 <i>hoxN</i>  | Rmet_1533 | NeF | NeF | Q1LN60 | High-affinity nickel-transporter   |
| Rep1 | Op0935f | 0.37 | 0.42 | 0.06 | 0.09 | 2.13 -            | Rmet_3359 | NeF | NeF | Q1LH25 | UBA/THIF-type NAD/FAD binding fold |
| Rep1 | Op0974r | 0.41 | 0.42 | 0.63 | 0.58 | 2.07 <i>livF5</i> | Rmet_3519 | 556 | 344 | Q1LHI5 | ABC transporter-related protein    |

### IIIB. Down-regulated in Q(EDTA:Δ7/ΔzupT) AND not regulated in Q(Zn:Δ7/ΔzupT) AND Up-regulated in Q(EDTA:Δ7/AE104)

#### cobW1 gene cluster

|      |         |      |      |      |      |                  |           |       |       |        |                                                                    |
|------|---------|------|------|------|------|------------------|-----------|-------|-------|--------|--------------------------------------------------------------------|
| Rep1 | Op0317f | 0.30 | 1.23 | 8.01 | 0.87 | 1.85 -           | Rmet_1098 | NeF   | NeF   | Q1LPE2 | Cobalamin synthesis protein, P47K                                  |
| Rep1 | Op0317f | 0.28 | 1.76 | 9.55 | 0.92 | 1.84 -           | Rmet_1099 | NeF   | NeF   | Q1LPE1 | UPF0343 protein Rmet_1099                                          |
| Rep1 | Op0317f | 0.27 | 1.25 | 8.65 | 0.87 | 2.26 <i>cysS</i> | Rmet_1100 | NeF   | NeF   | Q1LPE0 | CysteinyI-trNA synthetase                                          |
| Rep1 | Op0317f | 0.27 | 1.24 | 5.79 | 0.92 | 1.57 -           | Rmet_1101 | NeF   | NeF   | Q1LPD9 | 6-pyruvoyl-tetrahydropterin synthase-like protein                  |
| Rep1 | Op0317f | 0.27 | 1.17 | 6.28 | 0.71 | 1.15 -           | Rmet_1102 | NF/NF | NF/NF | Q1LPD8 | Carbonic anhydrases/acetyltransferase isoleucine patch superfamily |
| Rep1 | Op0317f | 0.32 | 1.24 | 6.50 | 0.91 | 1.85 <i>allB</i> | Rmet_1103 | NeF   | NeF   | Q1LPD7 | Dihydroorotase                                                     |

### IIIC. Down-regulated in Q(EDTA:Δ7/ΔzupT) AND not regulated in Q(Zn:Δ7/ΔzupT) AND NOT Up-regulated in Q(EDTA:Δ7/AE104)

|      |         |       |      |       |      |                  |           |       |       |        |                                                                     |
|------|---------|-------|------|-------|------|------------------|-----------|-------|-------|--------|---------------------------------------------------------------------|
| Rep1 | Op0178r | -3.64 | 1.28 | -3.11 | 0.97 | 0.99 -           | Rmet_0625 | NeF   | NeF   | Q1LQR5 | Uncharacterised conserved protein UCP028301                         |
| Rep1 | Op0232r | -1.47 | 1.08 | 0.83  | 0.88 | 0.96 <i>ggt</i>  | Rmet_0822 | 897   | 901   | Q1LQ68 | Gamma-glutamyltransferase 2. Threonine peptidase. MEROPS family T03 |
| Rep1 | Op0318r | 0.35  | 1.10 | 1.74  | 0.69 | 1.89 -           | Rmet_1104 | NeF   | NeF   | Q1LPD6 | TonB-dependent siderophore receptor                                 |
| Rep1 | Op0370r | 0.33  | 1.35 | 0.89  | 0.97 | 1.04 -           | Rmet_1290 | NF/NF | NF/NF | Q1LNV1 | HupH hydrogenase expression protein                                 |
| Rep1 | Op0701f | 0.39  | 1.30 | 1.01  | 1.02 | 1.00 -           | Rmet_2538 | 33    | NF/NF | Q1LKB1 | Porin, Gram-negative type                                           |
| Rep1 | Op0782r | -1.99 | 1.06 | -2.02 | 1.01 | 0.82 -           | Rmet_2777 | 36    | NF/NF | Q1LJM6 | Cobyrinic acid a,c-diamide synthase                                 |
| Rep1 | Op0886r | -5.20 | 0.78 | -5.30 | 0.96 | 1.06 <i>paqF</i> | Rmet_3162 | 1061  | 1332  | Q1LIJ2 | Short chain enoyl-CoA hydratase                                     |
| Rep1 | Op0935f | 0.40  | 0.64 | 0.41  | 0.71 | 1.05 -           | Rmet_3356 | 75    | NF/NF | Q1LH28 | ATP-binding region, ATPase-like protein                             |
| Rep1 | Op0962r | 0.46  | 0.89 | 1.04  | 0.82 | 0.94 -           | Rmet_3460 | NeF   | NeF   | Q1LHP4 | Putative uncharacterized protein                                    |
| Rep2 | Op1132f | 0.41  | 1.11 | 0.83  | 1.03 | 0.82 -           | Rmet_4025 | NeF   | NeF   | Q1LG33 | Major facilitator superfamily MFS_1                                 |
| Rep2 | Op1248f | -0.98 | 1.09 | -1.04 | 0.94 | 0.82 -           | Rmet_4387 | 255   | 439   | Q1LF24 | Tryptophan halogenase                                               |
| Rep2 | Op1395r | 0.48  | 1.17 | 0.94  | 0.97 | 0.95 -           | Rmet_4790 | NeF   | NeF   | Q1LDX4 | RND efflux system, outer membrane lipoprotein, NodT                 |

### III. Not regulated in Q(EDTA:Δ7/ΔzupT) AND down-regulated in Q(Zn:Δ7/ΔzupT)

#### IIIA. Genetic Information Processing

##### IIIA1. Translation

##### IIIA1a. Ribosome

|      |         |      |             |             |             |             |             |           |       |       |        |                                            |
|------|---------|------|-------------|-------------|-------------|-------------|-------------|-----------|-------|-------|--------|--------------------------------------------|
| Rep1 | Op0576r | 1.12 | <b>0.27</b> | 0.88        | 0.50        | 0.53        | <i>rplI</i> | Rmet_1976 | 8849  | 9065  | Q1LLX1 | 50S ribosomal protein L9                   |
| Rep1 | Op0576r | 1.06 | <b>0.27</b> | 0.91        | <b>0.50</b> | 0.53        | <i>rpsR</i> | Rmet_1977 | 5167  | 5626  | Q1LLX0 | 30S ribosomal protein S18                  |
| Rep1 | Op0576r | 1.12 | <b>0.32</b> | 1.02        | 0.50        | 0.52        | <i>priB</i> | Rmet_1978 | 56    | 53    | Q1LLW9 | Restart primosome assembly protein PriB    |
| Rep1 | Op0576r | 0.79 | <b>0.43</b> | 0.80        | 0.68        | 0.68        | <i>rpsF</i> | Rmet_1979 | 4861  | 5366  | Q1LLW8 | 30S ribosomal protein S6                   |
| Rep1 | Op0926r | 1.14 | <b>0.48</b> | 1.01        | 0.72        | <b>0.50</b> | <i>rplQ</i> | Rmet_3290 | 5888  | 6325  | Q1LI64 | 50S ribosomal protein L17                  |
| Rep1 | Op0926r | 0.96 | <b>0.41</b> | 0.87        | 0.75        | 0.67        | <i>rpsD</i> | Rmet_3292 | 7174  | 7959  | Q1LI62 | 30S ribosomal protein S4                   |
| Rep1 | Op0926r | 1.18 | <b>0.49</b> | 0.95        | 0.66        | 0.73        | <i>rpsK</i> | Rmet_3293 | 5353  | 5869  | Q1LI61 | 30S ribosomal protein S11                  |
| Rep1 | Op0926r | 0.99 | <b>0.45</b> | 0.85        | 0.67        | 0.76        | <i>rpsM</i> | Rmet_3294 | 4610  | 4997  | Q1LI60 | 30S ribosomal protein S13                  |
| Rep1 | Op0926r | 0.96 | <b>0.44</b> | 0.85        | 0.64        | 0.76        | <i>rpmJ</i> | Rmet_3295 | NeF   | NeF   | Q1LI59 | 50S ribosomal protein L36                  |
| Rep1 | Op0926r | 0.96 | <b>0.40</b> | 0.73        | 0.55        | 0.99        | <i>infA</i> | Rmet_3296 | 139   | 138   | Q1LI58 | Translation initiation factor IF-1 2       |
| Rep1 | Op0926r | 1.12 | <b>0.37</b> | 0.82        | 0.51        | 0.70        | <i>rplO</i> | Rmet_3298 | 6201  | 6664  | Q1LI56 | 50S ribosomal protein L15                  |
| Rep1 | Op0926r | 1.08 | <b>0.43</b> | 0.86        | 0.56        | 0.66        | <i>rpmD</i> | Rmet_3299 | 1634  | 3543  | Q1LI55 | 50S ribosomal protein L30                  |
| Rep1 | Op0926r | 0.97 | <b>0.44</b> | 0.79        | 0.55        | 0.82        | <i>rpsE</i> | Rmet_3300 | 5381  | 6434  | Q1LI54 | 30S ribosomal protein S5                   |
| Rep1 | Op0926r | 1.07 | <b>0.36</b> | 0.77        | 0.51        | 0.65        | <i>rplR</i> | Rmet_3301 | 4727  | 5155  | Q1LI53 | 50S ribosomal protein L18                  |
| Rep1 | Op0926r | 1.47 | <b>0.39</b> | 0.82        | <b>0.36</b> | 0.52        | <i>rplF</i> | Rmet_3302 | 7732  | 7720  | Q1LI52 | 50S ribosomal protein L6                   |
| Rep1 | Op0926r | 1.20 | <b>0.36</b> | 0.79        | <b>0.48</b> | 0.63        | <i>rpsH</i> | Rmet_3303 | 5099  | 5478  | Q1LI51 | 30S ribosomal protein S8                   |
| Rep1 | Op0926r | 1.03 | <b>0.28</b> | 0.72        | 0.55        | 0.91        | <i>rpsN</i> | Rmet_3304 | 567   | 1422  | Q1LI50 | SSU ribosomal protein S14P                 |
| Rep1 | Op0926r | 0.98 | <b>0.27</b> | 0.65        | 0.62        | 1.18        | <i>rplE</i> | Rmet_3305 | 5648  | 5794  | Q1LI49 | 50S ribosomal protein L5                   |
| Rep1 | Op0926r | 1.24 | <b>0.38</b> | 0.52        | 0.54        | 0.87        | <i>rplX</i> | Rmet_3306 | 5157  | 5464  | Q1LI48 | 50S ribosomal protein L24                  |
| Rep1 | Op0926r | 1.13 | <b>0.39</b> | <b>0.43</b> | <b>0.48</b> | 0.98        | <i>rplN</i> | Rmet_3307 | 4613  | 4259  | Q1LI47 | 50S ribosomal protein L14                  |
| Rep1 | Op0926r | 1.10 | <b>0.38</b> | 1.03        | 0.53        | 0.50        | <i>rpsQ</i> | Rmet_3308 | 3251  | 4144  | Q1LI46 | 30S ribosomal protein S17                  |
| Rep1 | Op0926r | 1.10 | <b>0.32</b> | 0.89        | <b>0.49</b> | 0.72        | <i>rpmC</i> | Rmet_3309 | 6327  | 6645  | Q1LI45 | 50S ribosomal protein L29                  |
| Rep1 | Op0926r | 1.02 | <b>0.31</b> | 0.92        | 0.51        | 0.61        | <i>rplP</i> | Rmet_3310 | 7207  | 7507  | Q1LI44 | 50S ribosomal protein L16                  |
| Rep1 | Op0926r | 0.93 | <b>0.33</b> | 0.86        | 0.71        | 0.92        | <i>rpsC</i> | Rmet_3311 | 5821  | 5414  | Q1LI43 | 30S ribosomal protein S3                   |
| Rep1 | Op0926r | 1.14 | <b>0.46</b> | 1.01        | 0.60        | 0.55        | <i>rplV</i> | Rmet_3312 | 5052  | 5381  | Q1LI42 | 50S ribosomal protein L22                  |
| Rep1 | Op0926r | 1.12 | <b>0.44</b> | 0.92        | 0.53        | 0.56        | <i>rpsS</i> | Rmet_3313 | 3671  | 4605  | Q1LI41 | 30S ribosomal protein S19                  |
| Rep1 | Op0926r | 1.17 | <b>0.29</b> | 0.87        | 0.55        | 0.89        | <i>rplB</i> | Rmet_3314 | 8352  | 8668  | Q1LI40 | 50S ribosomal protein L2                   |
| Rep1 | Op0926r | 1.15 | <b>0.36</b> | 0.89        | 0.66        | 0.63        | <i>rplW</i> | Rmet_3315 | 7955  | 8287  | B3R7S1 | 50S ribosomal subunit protein L23          |
| Rep1 | Op0926r | 1.11 | <b>0.32</b> | 0.91        | 0.66        | 0.74        | <i>rplD</i> | Rmet_3316 | 7471  | 7656  | Q1LI38 | 50S ribosomal protein L4                   |
| Rep1 | Op0926r | 1.13 | <b>0.41</b> | 0.78        | 0.66        | 0.67        | <i>rplC</i> | Rmet_3317 | 7040  | 7731  | Q1LI37 | 50S ribosomal protein L3                   |
| Rep1 | Op0928r | 1.03 | <b>0.42</b> | 0.95        | 0.72        | 0.75        | <i>rpsJ</i> | Rmet_3323 | 5007  | 5588  | B3R7S9 | 30S ribosomal subunit protein S10          |
| Rep1 | Op0928r | 1.16 | <b>0.32</b> | 0.75        | 0.63        | 0.86        | -           | Rmet_3324 | 14226 | 16250 | Q1LI13 | Elongation factor Tu                       |
| Rep1 | Op0928r | 1.03 | <b>0.38</b> | 0.99        | 0.61        | 0.64        | -           | Rmet_3325 | 7986  | 8299  | Q1LI29 | Elongation factor G 1                      |
| Rep1 | Op0928r | 1.14 | <b>0.35</b> | 0.98        | 0.62        | 0.55        | <i>rpsG</i> | Rmet_3326 | 7924  | 9112  | Q1LI28 | 30S ribosomal protein S7                   |
| Rep1 | Op0928r | 1.21 | <b>0.33</b> | 0.97        | 0.53        | 0.59        | <i>rpsL</i> | Rmet_3327 | 4440  | 4693  | Q1LI27 | 30S ribosomal protein S12                  |
| Rep1 | Op0930r | 1.02 | <b>0.47</b> | 0.73        | 0.69        | 0.89        | <i>rplJ</i> | Rmet_3336 | 5462  | 5628  | Q1LI18 | 50S ribosomal protein L10                  |
| Rep1 | Op0930r | 1.27 | <b>0.41</b> | 0.82        | 0.56        | 0.77        | <i>rplA</i> | Rmet_3337 | 9005  | 9349  | Q1LI17 | 50S ribosomal protein L1                   |
| Rep1 | Op0930r | 1.17 | <b>0.36</b> | 0.68        | 0.63        | 0.91        | <i>rplK</i> | Rmet_3338 | 4798  | 4974  | Q1LI16 | 50S ribosomal protein L11                  |
| Rep1 | Op0930r | 1.07 | <b>0.42</b> | 0.60        | 0.64        | 1.12        | <i>nusG</i> | Rmet_3339 | 3359  | 4005  | Q1LI15 | Transcription antitermination protein nusG |
| Rep1 | Op0874r | 1.17 | <b>0.41</b> | 0.68        | 0.71        | 0.92        | <i>rpmA</i> | Rmet_3105 | 2121  | 2882  | Q1LIP9 | 50S ribosomal protein L27                  |
| Rep1 | Op0874r | 1.04 | <b>0.45</b> | 0.72        | 0.79        | 1.01        | <i>rplU</i> | Rmet_3106 | 5361  | 5288  | Q1LIP8 | 50S ribosomal protein L21                  |
| Rep1 | Op0594r | 1.00 | <b>0.45</b> | 0.88        | 0.68        | 0.75        | <i>infB</i> | Rmet_2031 | 2797  | 2864  | Q1LLR6 | Translation initiation factor IF-2         |
| Rep1 | Op0594r | 0.93 | <b>0.40</b> | 0.60        | 0.64        | 1.08        | -           | Rmet_2033 | 1037  | 1276  | Q1LLR4 | UPF0090 protein Rmet_2033                  |
| Rep1 | Op0594r | 0.86 | <b>0.49</b> | 0.78        | 0.67        | 1.02        | -           | Rmet_2035 | 597   | 512   | Q1LLR2 | Condensin subunit ScpB                     |
| Rep1 | Op0680r | 1.10 | <b>0.42</b> | 0.76        | 0.68        | 0.78        | <i>rpmF</i> | Rmet_2432 | 3633  | 4851  | Q1LKL7 | 50S ribosomal protein L32                  |

|                                                         |         |      |             |      |             |             |              |           |      |      |        |                                                            |
|---------------------------------------------------------|---------|------|-------------|------|-------------|-------------|--------------|-----------|------|------|--------|------------------------------------------------------------|
| Rep1                                                    | Op0084r | 1.17 | <b>0.34</b> | 0.92 | 0.57        | 0.68        | <i>rplY</i>  | Rmet_0288 | 7358 | 8076 | Q1LRQ2 | 50S ribosomal protein L25                                  |
| Rep1                                                    | Op0084r | 1.17 | <b>0.34</b> | 0.92 | 0.57        | 0.68        | <i>rplY</i>  | Rmet_0288 | 7358 | 8076 | Q1LRQ2 | 50S ribosomal protein L25                                  |
| <b>IIIA1b. Other translation proteins</b>               |         |      |             |      |             |             |              |           |      |      |        |                                                            |
| Rep1                                                    | Op0016r | 1.08 | <b>0.49</b> | 1.03 | 0.70        | 0.81        | <i>gatB</i>  | Rmet_0046 | 1051 | 1250 | Q1LSE4 | Aspartyl/glutamyl-tRNA(Asn/Gln) amidotransferase subunit B |
| <b>IIIA2 Folding, Sorting and Degradation</b>           |         |      |             |      |             |             |              |           |      |      |        |                                                            |
| Rep1                                                    | Op0926r | 1.16 | <b>0.40</b> | 0.84 | 0.51        | 0.64        | <i>secY</i>  | Rmet_3297 | 882  | 376  | Q1LI57 | Preprotein translocase secY subunit                        |
| Rep1                                                    | Op0544r | 0.82 | <b>0.45</b> | 0.85 | 0.79        | 1.14        | -            | Rmet_1883 | 1666 | 1708 | Q1LM64 | ATP-dependent protease La                                  |
| Rep1                                                    | Op0544r | 1.23 | <b>0.46</b> | 0.97 | 0.71        | 0.54        | <i>tig</i>   | Rmet_1886 | 5656 | 6401 | Q1LM61 | Trigger factor                                             |
| Rep1                                                    | Op0918r | 0.79 | <b>0.38</b> | 1.04 | 0.79        | 0.63        | -            | Rmet_3234 | 792  | 350  | Q1LIC0 | Porin, Gram-negative type                                  |
| Rep1                                                    | Op0918r | 0.90 | <b>0.37</b> | 0.88 | 0.73        | 0.97        | <i>tatA</i>  | Rmet_3237 | 1578 | 883  | Q1LIB7 | Sec-independent protein translocase protein tatA/E homolog |
| Rep1                                                    | Op0918r | 1.09 | <b>0.46</b> | 0.98 | 0.66        | 0.72        | -            | Rmet_3251 | 365  | 459  | Q1LIA3 | BolA-like protein                                          |
| <b>IIIA3. Transcription</b>                             |         |      |             |      |             |             |              |           |      |      |        |                                                            |
| Rep1                                                    | Op0594r | 1.00 | <b>0.42</b> | 0.76 | 0.69        | 0.82        | <i>nusA</i>  | Rmet_2032 | 2898 | 3188 | Q1LLR5 | NusA antitermination factor                                |
| Rep1                                                    | Op0930r | 0.90 | <b>0.40</b> | 1.01 | 0.68        | 0.81        | <i>rpoC</i>  | Rmet_3333 | 4709 | 4801 | Q1LI21 | DNA-directed RNA polymerase subunit beta'                  |
| Rep1                                                    | Op0930r | 0.75 | <b>0.47</b> | 0.79 | 0.67        | 0.97        | <i>rpoB</i>  | Rmet_3334 | 4908 | 5411 | Q1LI20 | DNA-directed RNA polymerase subunit beta                   |
| Rep1                                                    | Op0926r | 1.08 | <b>0.47</b> | 0.97 | 0.71        | 0.63        | <i>rpoA</i>  | Rmet_3291 | 6895 | 8414 | Q1LI63 | DNA-directed RNA polymerase subunit alpha                  |
| Rep1                                                    | Op0730r | 1.11 | <b>0.46</b> | 0.93 | 0.71        | 0.75        | <i>rpoD1</i> | Rmet_2606 | 1927 | 1521 | Q1LK43 | RNA polymerase sigma factor                                |
| <b>IIIA4. Replication and Repair</b>                    |         |      |             |      |             |             |              |           |      |      |        |                                                            |
| Rep2                                                    | Op1377r | 0.86 | <b>0.40</b> | 1.26 | 1.09        | 1.24        | -            | Rmet_4749 | 6291 | 7312 | Q46TY9 | HU family DNA-binding protein                              |
| Rep2                                                    | Op1628f | 0.97 | <b>0.00</b> | 0.90 | 0.99        | 1.14        | <i>dam</i>   | Rmet_5483 | NeF  | NeF  | Q1LBY4 | DNA adenine methylase Dam                                  |
| <b>IIIB. Metabolism</b>                                 |         |      |             |      |             |             |              |           |      |      |        |                                                            |
| <b>IIIB1. Energy Metabolism</b>                         |         |      |             |      |             |             |              |           |      |      |        |                                                            |
| <b>IIIB1a. Oxidative phosphorylation [PATH:ko00190]</b> |         |      |             |      |             |             |              |           |      |      |        |                                                            |
| Rep1                                                    | Op0950r | 1.13 | <b>0.36</b> | 1.09 | 0.65        | 0.60        | -            | Rmet_3421 | 695  | 585  | Q1LHT3 | Conserved hypothetical signal peptide protein              |
| Rep1                                                    | Op0950r | 0.98 | <b>0.34</b> | 0.94 | 0.80        | 0.70        | -            | Rmet_3422 | 1258 | 828  | Q1LHT2 | Sulfur compound chelating protein SoxZ                     |
| Rep1                                                    | Op0950r | 0.89 | <b>0.38</b> | 0.88 | 0.82        | 0.57        | -            | Rmet_3423 | 1496 | 966  | Q1LHT1 | Twin-arginine translocation pathway signal                 |
| Rep1                                                    | Op0950r | 1.21 | <b>0.40</b> | 1.10 | 0.76        | <b>0.35</b> | -            | Rmet_3424 | 4227 | 2434 | Q1LHT0 | Cytochrome c, class I                                      |
| Rep1                                                    | Op0970r | 0.66 | <b>0.44</b> | 0.76 | 0.73        | 0.99        | -            | Rmet_3487 | 416  | 348  | Q1LHL7 | Tetratricopeptide TPR_4                                    |
| Rep1                                                    | Op0970r | 0.98 | <b>0.37</b> | 0.86 | 0.56        | 0.73        | <i>atpD</i>  | Rmet_3494 | 7664 | 6955 | Q1LHL0 | ATP synthase subunit beta                                  |
| Rep1                                                    | Op0970r | 0.96 | <b>0.31</b> | 0.96 | 0.56        | 0.61        | <i>atpG</i>  | Rmet_3495 | 2406 | 2347 | Q1LHK9 | ATP synthase gamma chain                                   |
| Rep1                                                    | Op0970r | 1.01 | <b>0.35</b> | 0.96 | 0.67        | 0.62        | <i>atpA</i>  | Rmet_3496 | 5312 | 4653 | Q1LHK8 | ATP synthase subunit alpha                                 |
| Rep1                                                    | Op0970r | 0.79 | <b>0.36</b> | 0.85 | 0.68        | 0.73        | <i>atpH</i>  | Rmet_3497 | 1892 | 1624 | Q1LHK7 | ATP synthase F1, delta subunit                             |
| Rep1                                                    | Op0970r | 1.01 | <b>0.36</b> | 0.82 | 0.64        | 0.75        | <i>atpF</i>  | Rmet_3498 | 1934 | 1021 | Q1LHK6 | ATP synthase B chain                                       |
| Rep1                                                    | Op0970r | 0.89 | <b>0.26</b> | 0.74 | 0.62        | 0.92        | <i>atpE</i>  | Rmet_3499 | 601  | 104  | Q1LHK5 | ATP synthase F0, C subunit                                 |
| Rep1                                                    | Op0970r | 0.91 | <b>0.45</b> | 0.82 | 0.66        | 0.87        | <i>atpB</i>  | Rmet_3500 | 778  | 274  | Q1LHK4 | ATP synthase A chain                                       |
| Rep1                                                    | Op0077f | 0.65 | <b>0.38</b> | 0.92 | 0.60        | 1.23        | <i>ctaB</i>  | Rmet_0270 | NeF  | NeF  | Q1LRS0 | Protoheme IX farnesyltransferase                           |
| Rep1                                                    | Op0914r | 0.85 | <b>0.41</b> | 0.85 | 0.91        | 1.00        | <i>petA</i>  | Rmet_3230 | 1409 | 1046 | Q1LIC4 | Ubiquinol-cytochrome c reductase, iron-sulfur subunit      |
| <b>IIIB1b. Sulfur metabolism [PATH:ko00920]</b>         |         |      |             |      |             |             |              |           |      |      |        |                                                            |
| Rep1                                                    | Op0792r | 1.08 | <b>0.48</b> | 1.11 | 0.76        | 0.70        | <i>cysN</i>  | Rmet_2812 | 1622 | 1395 | Q1LJJ1 | Sulfate adenylyltransferase subunit 1                      |
| Rep1                                                    | Op0792r | 0.78 | <b>0.44</b> | 0.85 | 0.68        | 0.86        | <i>cysD</i>  | Rmet_2813 | 1292 | 1269 | Q1LJJ0 | Sulfate adenylyltransferase subunit 2                      |
| Rep1                                                    | Op0792r | 0.99 | <b>0.46</b> | 1.07 | 0.83        | 0.71        | -            | Rmet_2815 | 1546 | 1827 | Q1LJJ8 | Uncharacterised conserved protein UCP030820                |
| <b>IIIB1c. Nitrogen metabolism [PATH:ko00910]</b>       |         |      |             |      |             |             |              |           |      |      |        |                                                            |
| Rep1                                                    | Op0438r | 0.73 | <b>0.32</b> | 0.85 | 0.62        | 1.16        | <i>ansB</i>  | Rmet_1583 | 3456 | 3637 | Q1LN10 | Asparaginase                                               |
| Rep1                                                    | Op0920r | 0.96 | <b>0.48</b> | 0.99 | 0.88        | 0.71        | <i>gltD</i>  | Rmet_3262 | 4014 | 4755 | Q1LI92 | Glutamate synthase (NADH) small subunit                    |
| <b>IIIB2. Carbohydrate Metabolism</b>                   |         |      |             |      |             |             |              |           |      |      |        |                                                            |
| <b>IIIB2a. Citrate cycle (TCA cycle) [PATH:ko00020]</b> |         |      |             |      |             |             |              |           |      |      |        |                                                            |
| Rep1                                                    | Op0596r | 1.33 | <b>0.44</b> | 1.28 | <b>0.39</b> | 0.72        | <i>sucB</i>  | Rmet_2049 | 4472 | 4881 | Q1LLP8 | 2-oxoglutarate dehydrogenase E2 component                  |
| Rep1                                                    | Op0596r | 0.93 | <b>0.38</b> | 0.85 | 0.79        | 0.88        | <i>kgd</i>   | Rmet_2050 | 4358 | 4654 | Q1LLP7 | 2-oxoglutarate dehydrogenase E1 component                  |
| Rep1                                                    | Op0596r | 0.94 | <b>0.43</b> | 0.91 | 0.82        | 0.80        | <i>kgd</i>   | Rmet_2050 | 4358 | 4654 | Q1LLP7 | 2-oxoglutarate dehydrogenase E1 component                  |
| Rep1                                                    | Op0596r | 0.97 | <b>0.44</b> | 0.95 | 0.79        | 0.77        | <i>kgd0</i>  | Rmet_2050 | 4358 | 4654 | Q1LLP7 | 2-oxoglutarate dehydrogenase E1 component                  |
| Rep2                                                    | Op1041r | 0.75 | <b>0.33</b> | 1.06 | 0.79        | 1.10        | <i>icdA</i>  | Rmet_3729 | 7557 | 9298 | Q1LGX5 | Isocitrate dehydrogenase, NADP-dependent                   |

### IIIB2b. Citrate cycle and amino acid biosynthesis

|      |         |      |             |      |      |             |              |           |       |       |        |                                                     |
|------|---------|------|-------------|------|------|-------------|--------------|-----------|-------|-------|--------|-----------------------------------------------------|
| Rep1 | Op0688r | 1.16 | <b>0.41</b> | 1.02 | 0.67 | 0.87        | <i>asd</i>   | Rmet_2471 | 4796  | 5428  | Q1LKH8 | Aspartate semialdehyde dehydrogenase                |
| Rep1 | Op0688r | 0.90 | <b>0.43</b> | 0.81 | 0.76 | 0.62        | <i>leuB</i>  | Rmet_2472 | 2330  | 3043  | Q1LKH7 | 3-isopropylmalate dehydrogenase                     |
| Rep1 | Op0688r | 1.05 | <b>0.48</b> | 0.96 | 0.78 | 0.61        | <i>leuC</i>  | Rmet_2475 | 1783  | 2038  | Q1LKH4 | 3-isopropylmalate dehydratase, large subunit        |
| Rep1 | Op0688r | 0.76 | <b>0.38</b> | 0.91 | 0.62 | 0.72        | <i>livG</i>  | Rmet_2477 | 772   | 261   | Q1LKH2 | ABC transporter-related protein                     |
| Rep1 | Op0688r | 0.66 | <b>0.26</b> | 1.07 | 0.82 | 0.75        | <i>livK1</i> | Rmet_2480 | 11003 | 10023 | Q1LKG9 | Extracellular ligand-binding receptor               |
| Rep1 | Op0688r | 1.08 | <b>0.37</b> | 1.03 | 0.69 | 0.51        | <i>gltA</i>  | Rmet_2481 | 8951  | 9563  | Q1LKG8 | Citrate synthase                                    |
| Rep1 | Op0688r | 1.17 | <b>0.35</b> | 1.00 | 0.63 | <b>0.47</b> | -            | Rmet_2482 | 309   | 355   | Q1LKG7 | Putative uncharacterized protein                    |
| Rep1 | Op0688r | 0.96 | <b>0.43</b> | 0.79 | 0.73 | 0.58        | <i>sdhB</i>  | Rmet_2483 | 4739  | 3592  | Q1LKG6 | Succinate dehydrogenase subunit B                   |
| Rep1 | Op0688r | 1.11 | <b>0.47</b> | 0.74 | 0.63 | <b>0.38</b> | <i>sdhA</i>  | Rmet_2484 | 6561  | 5524  | Q1LKG5 | Succinate dehydrogenase subunit A                   |
| Rep1 | Op0688r | 1.33 | <b>0.49</b> | 0.72 | 0.62 | <b>0.38</b> | <i>sdhD</i>  | Rmet_2485 | 326   | NF/NF | Q1LKG4 | Succinate dehydrogenase subunit D                   |
| Rep1 | Op0280r | 0.63 | <b>0.28</b> | 0.96 | 1.09 | 1.23        | <i>aroG</i>  | Rmet_0989 | 1309  | 2399  | Q1LPQ1 | 3-deoxy-D-arabinoheptulosonate-7-phosphate synthase |
| Rep1 | Op0294r | 1.12 | <b>0.41</b> | 1.03 | 0.50 | 0.69        | <i>tyrB</i>  | Rmet_1018 | 5021  | 4750  | Q1LPM2 | Aminotransferase                                    |
| Rep1 | Op0574r | 1.12 | <b>0.48</b> | 1.06 | 0.67 | 0.73        | <i>thrA</i>  | Rmet_1966 | 2589  | 2580  | Q1LLY1 | Homoserine dehydrogenase                            |

### IIIB3. Lipid Metabolism

|      |         |      |             |      |      |      |             |           |      |      |        |                                              |
|------|---------|------|-------------|------|------|------|-------------|-----------|------|------|--------|----------------------------------------------|
| Rep1 | Op0680r | 0.93 | <b>0.47</b> | 0.85 | 0.77 | 0.93 | -           | Rmet_2419 | 308  | 64   | Q1LKN0 | Putative transmembrane protein               |
| Rep1 | Op0680r | 0.76 | <b>0.46</b> | 0.94 | 0.69 | 0.81 | <i>fabF</i> | Rmet_2426 | 2366 | 2708 | Q1LKM3 | 3-oxoacyl-[acyl-carrier-protein] synthase II |
| Rep1 | Op0680r | 0.70 | <b>0.31</b> | 0.79 | 0.64 | 0.99 | <i>acpP</i> | Rmet_2427 | 7863 | 7231 | Q1LKM2 | Acyl carrier protein                         |

### IIIB4. Carbohydrates

|      |         |      |             |      |      |      |              |           |      |      |        |                                          |
|------|---------|------|-------------|------|------|------|--------------|-----------|------|------|--------|------------------------------------------|
| Rep1 | Op0072r | 0.68 | <b>0.32</b> | 0.77 | 0.58 | 1.13 | <i>gpmA</i>  | Rmet_0251 | 1132 | 1489 | Q1LRT9 | Phosphoglycerate mutase                  |
| Rep1 | Op0840r | 1.12 | <b>0.38</b> | 1.19 | 0.58 | 0.67 | <i>cbgG2</i> | Rmet_2979 | 3058 | 3444 | Q1LJ24 | Glyceraldehyde-3-phosphate dehydrogenase |

### IIIB5. Metabolism, other

|      |         |      |             |      |             |      |             |           |       |       |        |                                           |
|------|---------|------|-------------|------|-------------|------|-------------|-----------|-------|-------|--------|-------------------------------------------|
| Rep1 | Op0132r | 0.90 | <b>0.41</b> | 0.94 | 0.52        | 0.94 | <i>rfaF</i> | Rmet_0491 | 484   | 101   | Q1LR49 | Lipopolysaccharide heptosyltransferase II |
| Rep1 | Op0135f | 1.05 | <b>0.49</b> | 1.03 | 0.62        | 0.65 | <i>purK</i> | Rmet_0506 | 1317  | 1474  | Q1LR34 | Phosphoribosylaminoimidazole carboxylase  |
| Rep1 | Op0772r | 1.29 | <b>0.49</b> | 0.93 | <b>0.48</b> | 0.79 | <i>pyrB</i> | Rmet_2740 | 1099  | 1152  | Q1LJR3 | Aspartate carbamoyltransferase            |
| Rep1 | Op0832r | 1.04 | <b>0.48</b> | 1.01 | 0.80        | 0.84 | <i>purB</i> | Rmet_2956 | 2277  | 2257  | Q1LJ47 | Adenylosuccinate lyase                    |
| Rep1 | Op0870r | 0.60 | <b>0.44</b> | 0.63 | 0.72        | 1.41 | <i>nrda</i> | Rmet_3088 | 1801  | 1926  | Q1LIR6 | Ribonucleoside-diphosphate reductase      |
| Rep2 | Op1128f | 1.13 | <b>0.37</b> | 1.13 | 0.69        | 0.62 | <i>pobA</i> | Rmet_4018 | NF/NF | NF/NF | Q1LG40 | 4-hydroxybenzoate 3-monooxygenase         |

### IIIC. Environmental Information Processing

#### IIIC1. Membrane Transport

|      |         |      |             |      |      |      |   |           |      |      |        |                                                |
|------|---------|------|-------------|------|------|------|---|-----------|------|------|--------|------------------------------------------------|
| Rep1 | Op0352r | 0.58 | <b>0.29</b> | 1.14 | 1.22 | 0.73 | - | Rmet_1210 | NeF  | NeF  | Q1LP30 | Inner-membrane translocator                    |
| Rep1 | Op0352r | 0.54 | <b>0.22</b> | 1.28 | 1.09 | 0.66 | - | Rmet_1211 | 5080 | 6638 | Q1LP29 | Putative uncharacterized protein               |
| Rep1 | Op0614r | 0.85 | <b>0.46</b> | 0.85 | 0.82 | 0.87 | - | Rmet_2122 | 1618 | 866  | Q1LLH5 | Extracellular solute-binding protein, family 3 |
| Rep1 | Op0202r | 0.91 | <b>0.33</b> | 1.03 | 0.78 | 0.82 | - | Rmet_0712 | 4696 | 2666 | Q1LQH8 | OmpA/MotB                                      |
| Rep1 | Op0974r | 0.79 | <b>0.46</b> | 1.06 | 0.74 | 1.39 | - | Rmet_3518 | 1829 | 2120 | Q1LH16 | Extracellular ligand-binding receptor          |

#### IIID. Cellular Processes

|      |         |      |             |      |      |      |            |           |      |       |        |                                            |
|------|---------|------|-------------|------|------|------|------------|-----------|------|-------|--------|--------------------------------------------|
| Rep1 | Op0862r | 0.81 | <b>0.23</b> | 1.00 | 0.71 | 1.03 | -          | Rmet_3071 | 973  | 1262  | Q1LIT3 | Histone H1-like protein                    |
| Rep1 | Op0862r | 0.91 | <b>0.39</b> | 0.76 | 0.67 | 1.09 | -          | Rmet_3072 | NeF  | NeF   | Q1LIT2 | Putative uncharacterized protein           |
| Rep1 | Op0808r | 0.87 | <b>0.44</b> | 0.69 | 0.64 | 1.08 | <i>scd</i> | Rmet_2875 | 83   | NF/NF | Q1LJC8 | Fatty acid desaturase                      |
| Rep1 | Op0878r | 0.90 | <b>0.48</b> | 0.97 | 0.88 | 0.81 | -          | Rmet_3123 | 1518 | 1852  | Q1LIN1 | Cell division protein ftsZ                 |
| Rep2 | Op1025r | 0.90 | <b>0.38</b> | 1.08 | 0.93 | 1.04 | -          | Rmet_3677 | 3412 | 4268  | Q1LH27 | Nucleoid protein H-NS                      |
| Rep1 | Op0608r | 1.07 | <b>0.49</b> | 1.10 | 0.91 | 0.78 | <i>hfq</i> | Rmet_2101 | 115  | 176   | Q1LJ6  | Protein hfq                                |
| Rep2 | Op1375r | 1.02 | <b>0.41</b> | 1.22 | 0.81 | 0.96 | -          | Rmet_4742 | 8265 | 8706  | Q1LE22 | Histone-like DNA-binding protein           |
| Rep1 | Op0972r | 1.41 | <b>0.39</b> | 1.65 | 0.51 | 0.69 | -          | Rmet_3503 | 681  | 477   | Q1LHK1 | Chromosome segregation DNA-binding protein |

#### IIIE. Other Processes

|      |         |      |             |      |      |      |             |           |      |      |        |                                  |
|------|---------|------|-------------|------|------|------|-------------|-----------|------|------|--------|----------------------------------|
| Rep1 | Op0756r | 0.83 | <b>0.45</b> | 0.94 | 0.84 | 0.81 | -           | Rmet_2673 | 896  | 849  | Q1LJY0 | TPR repeat                       |
| Rep1 | Op0756r | 0.86 | <b>0.47</b> | 0.90 | 0.74 | 0.80 | -           | Rmet_2674 | 2796 | 1461 | Q1LJX9 | OmpA/MotB                        |
| Rep1 | Op0756r | 0.72 | <b>0.47</b> | 0.83 | 0.59 | 0.91 | <i>tolB</i> | Rmet_2675 | 1322 | 903  | Q1LJX8 | Protein tolB                     |
| Rep1 | Op0022r | 0.75 | <b>0.40</b> | 0.76 | 0.62 | 1.13 | -           | Rmet_0077 | 782  | 734  | Q1LSB3 | Putative uncharacterized protein |
| Rep1 | Op0066r | 0.93 | <b>0.49</b> | 0.88 | 0.76 | 0.82 | -           | Rmet_0224 | 184  | 532  | Q1LRW6 | Putative uncharacterized protein |
| Rep1 | Op0066r | 1.07 | <b>0.43</b> | 0.78 | 0.58 | 0.69 | -           | Rmet_0227 | NeF  | NeF  | Q1LRW3 | Ferredoxin-like protein          |

|      |         |      |             |             |             |                  |           |       |       |        |                                                          |
|------|---------|------|-------------|-------------|-------------|------------------|-----------|-------|-------|--------|----------------------------------------------------------|
| Rep1 | Op0140r | 1.07 | <b>0.45</b> | 1.12        | 0.75        | 0.90 -           | Rmet_0521 | 13246 | 11923 | Q1LR19 | Uncharacterized protein UPF0065                          |
| Rep1 | Op0181f | 1.01 | <b>0.38</b> | 0.86        | 0.97        | 1.01 -           | Rmet_0655 | NeF   | NeF   | Q1LQN5 | Putative membrane protein                                |
| Rep1 | Op0234r | 0.90 | <b>0.45</b> | 0.65        | <b>0.45</b> | 0.72 -           | Rmet_0825 | 507   | 187   | Q1LQ65 | Putative uncharacterized protein                         |
| Rep1 | Op0244r | 1.37 | <b>0.37</b> | 1.75        | <b>0.42</b> | 0.54 -           | Rmet_0854 | 173   | 69    | Q1LQ36 | Serine/threonine protein kinase                          |
| Rep1 | Op0312r | 1.00 | <b>0.47</b> | 1.09        | <b>0.49</b> | 0.68 -           | Rmet_1084 | 604   | 473   | Q1LPF6 | Tetratricopeptide TPR_2                                  |
| Rep1 | Op0328r | 0.82 | <b>0.38</b> | 0.70        | 0.67        | 0.92 -           | Rmet_1146 | 2133  | 1776  | Q1LP94 | Electron transfer flavoprotein-ubiquinone oxidoreductase |
| Rep1 | Op0348r | 1.00 | <b>0.43</b> | 1.01        | 0.53        | 1.78 -           | Rmet_1200 | 2694  | 2115  | Q1LP40 | Phasin                                                   |
| Rep1 | Op0462r | 0.87 | <b>0.42</b> | 0.97        | 0.84        | 0.97 -           | Rmet_1642 | 85    | NF/NF | Q1LMV1 | Putative uncharacterized protein                         |
| Rep1 | Op0571f | 0.87 | <b>0.33</b> | 0.83        | 1.03        | 1.05 -           | Rmet_1949 | NeF   | NeF   | Q1LLZ8 | General substrate transporter                            |
| Rep1 | Op0612r | 0.72 | <b>0.38</b> | 0.97        | 0.88        | 1.01 -           | Rmet_2116 | 1079  | 548   | Q1LLI1 | Peptidase M23B                                           |
| Rep1 | Op0618r | 0.92 | <b>0.49</b> | 1.00        | 0.85        | 0.72 -           | Rmet_2142 | NeF   | NeF   | Q1LLF5 | NLP/P60                                                  |
| Rep1 | Op0652r | 1.05 | <b>0.45</b> | 1.30        | 0.72        | <b>3.26</b> -    | Rmet_2281 | 4287  | 5000  | Q1LL16 | Putative uncharacterized protein                         |
| Rep1 | Op0654r | 1.40 | <b>0.47</b> | 0.93        | 0.63        | 0.75 -           | Rmet_2286 | 0     | 0     | Q1LL11 | Putative uncharacterized protein                         |
| Rep1 | Op0659f | 1.77 | <b>0.14</b> | 1.30        | <b>0.49</b> | 0.78 -           | Rmet_2305 | NeF   | NeF   | Q8GQ16 | Putative uncharacterized protein ORF C95                 |
| Rep1 | Op0694r | 0.58 | <b>0.35</b> | 0.89        | 0.70        | 1.43 -           | Rmet_2502 | 300   | 243   | Q1LKE7 | Cytochrome c, class I                                    |
| Rep1 | Op0701f | 0.64 | <b>0.48</b> | 1.16        | 0.73        | 0.80 -           | Rmet_2539 | NeF   | NeF   | Q1LKB0 | Putative uncharacterized protein                         |
| Rep1 | Op0725f | 0.51 | <b>0.28</b> | 0.65        | 0.92        | 1.75 -           | Rmet_2593 | 24    | NF/NF | Q1LK56 | Glycosyl transferase, family 28                          |
| Rep1 | Op0760r | 0.89 | <b>0.43</b> | 0.79        | 0.68        | 0.80 -           | Rmet_2697 | NeF   | NeF   | Q1LJV6 | Lytic transglycosylase, catalytic                        |
| Rep1 | Op0818r | 0.89 | <b>0.44</b> | 1.15        | 0.87        | 1.05 -           | Rmet_2902 | 1566  | 1874  | Q1LJA1 | Ornithine carbamoyltransferase                           |
| Rep1 | Op0940r | 0.79 | <b>0.27</b> | 0.67        | 1.00        | 1.31 -           | Rmet_3379 | 543   | NF/NF | Q1LHX5 | Transcriptional regulator, AsnC family                   |
| Rep1 | Op0992r | 1.00 | <b>0.38</b> | 1.13        | 0.59        | 0.90 -           | Rmet_3572 | NeF   | NeF   | Q1LHD2 | 17 kDa surface antigen                                   |
| Rep2 | Op1050f | 0.98 | <b>0.24</b> | 0.91        | 1.04        | 0.89 -           | Rmet_3779 | NeF   | NeF   | Q1LGS7 | Monooxygenase, FAD-binding                               |
| Rep2 | Op1067r | 0.65 | <b>0.13</b> | <b>2.92</b> | <b>0.28</b> | <b>0.38</b> -    | Rmet_3842 | NeF   | NeF   | Q1LGL6 | Putative uncharacterized protein                         |
| Rep2 | Op1419r | 1.20 | <b>0.18</b> | 0.89        | 0.51        | 1.06 -           | Rmet_4864 | NeF   | NeF   | Q1LDQ0 | Putative uncharacterized protein                         |
| Rep2 | Op1448f | 0.88 | <b>0.16</b> | 0.92        | 0.90        | 0.88 -           | Rmet_4934 | NeF   | NeF   | Q1LDI0 | Xanthine/uracil/vitamin C permease                       |
| Rep2 | Op1493r | 0.73 | <b>0.40</b> | 0.88        | 0.76        | 0.96 <i>metE</i> | Rmet_5073 | 3925  | 4886  | Q1LD41 | Putative uncharacterized protein                         |
| Rep2 | Op1641r | 0.91 | <b>0.48</b> | 0.86        | 0.81        | 0.92 -           | Rmet_5519 | 136   | 96    | Q1LBU8 | Electron transfer flavoprotein beta-subunit              |

#### IV. Not regulated in Q(EDTA:Δ7/ΔzupT) AND up-regulated in Q(Zn:Δ7/ΔzupT)

|      |         |      |             |             |             |                          |           |      |       |        |                                                                    |
|------|---------|------|-------------|-------------|-------------|--------------------------|-----------|------|-------|--------|--------------------------------------------------------------------|
| Rep1 | Op0003f | 1.72 | <b>2.26</b> | 1.36        | 1.42        | 0.65 -                   | Rmet_0014 | NeF  | NeF   | Q1LSH6 | Putative uncharacterized protein                                   |
| Rep1 | Op0094r | 1.06 | <b>2.53</b> | 1.06        | <b>2.01</b> | 0.86 -                   | Rmet_0332 | 25   | NF/NF | Q1LRK8 | Glyoxalase/bleomycin resistance protein/dioxygenase                |
| Rep1 | Op0098r | 1.00 | <b>2.09</b> | 0.97        | 1.12        | 0.98 -                   | Rmet_0349 | 384  | 352   | Q1LRJ1 | ABC transporter-related protein                                    |
| Rep1 | Op0164r | 1.00 | <b>2.73</b> | 0.85        | <b>2.05</b> | 0.93 -                   | Rmet_0581 | NeF  | NeF   | Q1LQV9 | Paraquat-inducible protein A                                       |
| Rep1 | Op0187f | 1.59 | <b>2.08</b> | 1.16        | 1.24        | 0.97 <i>pill</i>         | Rmet_0671 | 66   | NF/NF | Q1LQL9 | CheW protein                                                       |
| Rep1 | Op0197f | 1.26 | <b>2.33</b> | 1.42        | 1.63        | 0.83 <i>gltI</i>         | Rmet_0701 | 524  | 225   | Q1LQI9 | Extracellular solute-binding protein, family 3                     |
| Rep1 | Op0267f | 1.61 | <b>2.99</b> | 1.24        | 0.91        | <b>0.32</b> <i>livF9</i> | Rmet_0956 | 171  | 308   | Q1LPT4 | ABC transporter-related protein                                    |
| Rep1 | Op0267f | 1.04 | <b>2.68</b> | 0.96        | <b>2.42</b> | 1.04 -                   | Rmet_0957 | NeF  | NeF   | Q1LPT3 | Urease accessory protein ureD                                      |
| Rep1 | Op0379f | 1.65 | <b>2.01</b> | 1.45        | 1.12        | 0.72 <i>traG</i>         | Rmet_1339 | NeF  | NeF   | Q1LNQ4 | TRAG protein                                                       |
| Rep1 | Op0379f | 1.66 | <b>2.85</b> | 1.27        | 0.91        | <b>0.35</b> -            | Rmet_1346 | NeF  | NeF   | Q1LNP7 | Putative lipoprotein                                               |
| Rep1 | Op0385f | 1.29 | <b>2.21</b> | 1.17        | 1.09        | 0.87 -                   | Rmet_1381 | 48   | 215   | Q1LNL2 | Transcriptional regulator, LytR/AlgR family                        |
| Rep1 | Op0452r | 1.34 | <b>2.16</b> | 1.29        | 0.90        | 0.66 -                   | Rmet_1624 | NeF  | NeF   | Q1LMW9 | Drug resistance transporter EmrB/QacA subfamily                    |
| Rep1 | Op0481f | 0.76 | <b>2.76</b> | 1.39        | 1.38        | <b>8.04</b> -            | Rmet_1705 | 1360 | 576   | Q1LMP0 | Putative uncharacterized protein                                   |
| Rep1 | Op0483f | 0.65 | <b>2.52</b> | 1.05        | 1.20        | <b>2.41</b> -            | Rmet_1708 | NeF  | NeF   | Q1LMN7 | Putative uncharacterized protein                                   |
| Rep1 | Op0539f | 1.42 | <b>2.03</b> | 1.54        | 1.16        | 0.51 -                   | Rmet_1867 | 412  | 438   | Q1LM80 | Transcriptional regulator BOLA                                     |
| Rep1 | Op0623f | 1.68 | <b>2.25</b> | 1.52        | 1.98        | 1.06 -                   | Rmet_2163 | 203  | 163   | Q1LLD4 | Transcriptional regulator, XRE family                              |
| Rep1 | Op0663f | 1.24 | <b>3.67</b> | <b>0.46</b> | 1.92        | 1.49 -                   | Rmet_2360 | NeF  | NeF   | Q8GQ70 | Putative uncharacterized protein ORF C40                           |
| Rep1 | Op0737f | 1.63 | <b>2.44</b> | 1.35        | 1.18        | <b>0.45</b> <i>vals</i>  | Rmet_2630 | 1578 | 1707  | Q1LK19 | Valyl-tRNA synthetase                                              |
| Rep1 | Op0775f | 1.10 | <b>2.04</b> | 0.98        | 1.74        | 1.22 -                   | Rmet_2752 | 232  | 82    | Q1LJQ1 | Tripartite ATP-independent periplasmic transporter, DctQ component |
| Rep2 | Op1020f | 1.10 | <b>2.62</b> | 1.60        | 1.80        | 1.13 -                   | Rmet_3666 | NeF  | NeF   | Q1LH38 | Putative uncharacterized protein                                   |
| Rep2 | Op1148f | 1.67 | <b>2.36</b> | 1.14        | 1.21        | 0.95 <i>phoA1</i>        | Rmet_4084 | 1248 | 137   | Q1LFX5 | Alkaline phosphatase                                               |

|      |         |      |      |      |      |      |              |           |       |         |        |                                          |                                      |
|------|---------|------|------|------|------|------|--------------|-----------|-------|---------|--------|------------------------------------------|--------------------------------------|
| Rep2 | Op1162f | 1.62 | 2.11 | 1.32 | 1.69 | 1.06 | -            | Rmet_4126 | NeF   | NeF     | Q1LFT3 | Nitrogen fixation protein NifQ, putative |                                      |
| Rep2 | Op1330f | 1.81 | 2.23 | 0.89 | 1.19 | 0.96 | -            | Rmet_4615 | NeF   | NeF     | Q1LEE9 | Transcriptional regulator, GntR family   |                                      |
| Rep2 | Op1375r | 1.12 | 2.48 | 1.13 | 1.96 | 0.73 | -            | Rmet_4743 | NeF   | NeF     | Q1LE21 | Putative uncharacterized protein         |                                      |
| Rep2 | Op1412f | 1.36 | 2.50 | 1.33 | 1.97 | 0.82 | -            | Rmet_4843 |       | 16 13   | Q1LDS1 | ABC transporter related                  |                                      |
| Rep2 | Op1490f | 1.15 | 2.10 | 1.14 | 1.56 | 0.95 | -            | Rmet_5058 | NF/NF | NF/NF   | Q1LD56 | Uncharacterized protein UPF0065          |                                      |
| Rep2 | Op1490f | 0.98 | 2.54 | 1.02 | 1.83 | 1.08 | <i>atoD</i>  | Rmet_5059 |       | 22      | NF/NF  | Q1LD55                                   | 3-oxoacid CoA-transferase, subunit A |
| Rep2 | Op1490f | 1.37 | 2.89 | 1.19 | 2.06 | 0.88 | <i>atoA1</i> | Rmet_5060 | NeF   | NeF     | Q1LD54 | Butyryl-CoA:acetate CoA transferase      |                                      |
| Rep2 | Op1516f | 1.87 | 2.03 | 1.66 | 1.27 | 0.69 | -            | Rmet_5151 | NeF   | NeF     | Q1LCW6 | Transcriptional regulator, LysR family   |                                      |
| Rep2 | Op1552f | 1.65 | 2.34 | 1.36 | 0.60 | 0.23 | <i>flif</i>  | Rmet_5261 | NeF   | NeF     | Q1LCK6 | Flagellar M-ring protein Flif            |                                      |
| Rep2 | Op1644f | 1.30 | 2.07 | 1.01 | 1.13 | 0.65 | -            | Rmet_5531 |       | 351 231 | Q1LBT6 | Transcriptional regulator, GntR family   |                                      |
| Rep2 | Op1644f | 1.36 | 2.43 | 1.13 | 1.16 | 0.60 | -            | Rmet_5532 |       | 408 364 | Q1LBT5 | Transcriptional regulator, GntR family   |                                      |
| Rep2 | Op1701r | 1.03 | 2.17 | 1.06 | 2.14 | 0.86 | -            | Rmet_5694 | NeF   | NeF     | Q1LBC3 | Putative uncharacterized protein         |                                      |

#### V. Not regulated in Q(EDTA:Δ7/ΔzupT) AND not regulated in Q(Zn:Δ7/ΔzupT)

| VA. Down-regulated in Q(EDTA:Δ7/AE104) AND down-regulated in Q(Zn:Δ7/AE104) |         |      |      |      |      |      |   |           |       |         |        |                                                                      |                                                               |
|-----------------------------------------------------------------------------|---------|------|------|------|------|------|---|-----------|-------|---------|--------|----------------------------------------------------------------------|---------------------------------------------------------------|
| Rep1                                                                        | Op0026r | 1.39 | 1.01 | 0.25 | 0.50 | 2.66 | - | Rmet_0092 |       | 46      | NF/NF  | Q1LS98                                                               | Histidine kinase                                              |
| Rep1                                                                        | Op0228r | 1.81 | 1.18 | 0.22 | 0.27 | 2.12 | - | Rmet_0804 | NeF   | NeF     | Q1LQ86 | SPFH domain, Band 7 family protein                                   |                                                               |
| Rep1                                                                        | Op0228r | 1.60 | 1.10 | 0.29 | 0.35 | 2.21 | - | Rmet_0805 | NeF   | NeF     | Q1LQ85 | Putative uncharacterized protein                                     |                                                               |
| Rep1                                                                        | Op0248r | 1.29 | 0.66 | 0.27 | 0.41 | 2.36 | - | Rmet_0863 | NeF   | NeF     | Q1LQ27 | Putative uncharacterized protein                                     |                                                               |
| Rep1                                                                        | Op0249f | 1.36 | 1.59 | 0.33 | 0.43 | 2.30 | - | Rmet_0864 |       | 135 156 | Q1LQ26 | Putative uncharacterized protein                                     |                                                               |
| Rep1                                                                        | Op0249f | 1.21 | 1.77 | 0.28 | 0.38 | 2.67 | - | Rmet_0865 | NeF   | NeF     | Q1LQ25 | Putative uncharacterized protein                                     |                                                               |
| Rep1                                                                        | Op0638r | 1.74 | 1.11 | 0.49 | 0.41 | 1.40 | - | Rmet_2231 | NeF   | NeF     | Q1LL66 | Binding-protein-dependent transport systems inner membrane component |                                                               |
| Rep1                                                                        | Op0664r | 1.40 | 0.59 | 0.17 | 0.16 | 1.96 | - | Rmet_2362 |       | 30      | NF/NF  | Q8GQ72                                                               | Putative uncharacterized protein ORF C38                      |
| Rep1                                                                        | Op0748r | 1.06 | 1.17 | 0.31 | 0.47 | 1.62 | - | Rmet_2647 | NF/NF | NF/NF   | Q1LK02 | Transcriptional regulator, AsnC family                               |                                                               |
| Rep1                                                                        | Op0808r | 1.62 | 1.26 | 0.22 | 0.38 | 2.68 | - | Rmet_2876 |       | 105     | NF/NF  | Q1LJC7                                                               | MscS Mechanosensitive ion channel                             |
| Rep1                                                                        | Op0935f | 0.70 | 0.73 | 0.13 | 0.26 | 2.29 | - | Rmet_3358 |       | 69 55   | Q1LH26 | Putative uncharacterized protein                                     |                                                               |
| Rep1                                                                        | Op0935f | 0.65 | 0.66 | 0.16 | 0.36 | 2.85 | - | Rmet_3360 | NeF   | NeF     | Q1LH24 | Putative uncharacterized protein                                     |                                                               |
| Rep1                                                                        | Op0935f | 0.72 | 0.89 | 0.20 | 0.35 | 1.96 | - | Rmet_3361 | NeF   | NeF     | Q1LH23 | Putative uncharacterized protein                                     |                                                               |
| Rep1                                                                        | Op0935f | 0.94 | 0.67 | 0.26 | 0.27 | 1.81 | - | Rmet_3362 | NeF   | NeF     | Q1LH22 | Putative uncharacterized protein                                     |                                                               |
| Rep1                                                                        | Op0936r | 0.85 | 0.98 | 0.15 | 0.20 | 2.11 | - | Rmet_3365 | NeF   | NeF     | Q1LHY9 | Integrase, catalytic region                                          |                                                               |
| Rep2                                                                        | Op1009r | 1.53 | 1.22 | 0.27 | 0.30 | 1.87 | - | Rmet_3625 |       | 249 96  | Q1LH79 | Putative uncharacterized protein                                     |                                                               |
| Rep2                                                                        | Op1275r | 1.30 | 0.95 | 0.47 | 0.46 | 1.74 | - | Rmet_4472 | NeF   | NeF     | Q1LEG4 | Sulphate transporter                                                 |                                                               |
| Rep2                                                                        | Op1279r | 1.98 | 0.98 | 0.46 | 0.38 | 1.84 | - | Rmet_4494 |       | 23 255  | Q1LER7 | Putative uncharacterized protein                                     |                                                               |
| Rep2                                                                        | Op1324f | 1.35 | 1.21 | 0.36 | 0.50 | 1.97 | - | Rmet_4600 | NeF   | NeF     | Q1LEG4 | Sulphate transporter                                                 |                                                               |
| Rep2                                                                        | Op1341r | 1.43 | 1.41 | 0.18 | 0.36 | 3.04 | - | Rmet_4645 |       | 157     | NF/NF  | Q1LEB9                                                               | Uncharacterized protein UPF0065                               |
| Rep2                                                                        | Op1461r | 1.32 | 0.98 | 0.24 | 0.40 | 2.38 | - | Rmet_4978 | NQ/NQ | NQ/NQ   | Q1LDD6 | Two component transcriptional regulator, winged helix family         |                                                               |
| Rep2                                                                        | Op1505r | 1.25 | 1.35 | 0.32 | 0.43 | 1.84 | - | Rmet_5112 | NF/NF | NF/NF   | Q1LD05 | Putative uncharacterized protein                                     |                                                               |
| VB. Down-regulated in Q(EDTA:Δ7/AE104) AND not regulated in Q(Zn:Δ7/AE104)  |         |      |      |      |      |      |   |           |       |         |        |                                                                      |                                                               |
| Rep1                                                                        | Op0004r | 1.17 | 1.14 | 0.37 | 0.75 | 2.12 | - | Rmet_0022 |       | 29      | NF/NF  | Q1LSG8                                                               | Transcriptional regulator, AraC family                        |
| Rep1                                                                        | Op0027f | 1.29 | 1.17 | 0.49 | 0.83 | 2.21 | - | Rmet_0093 | NeF   | NeF     | Q1LS97 | UPF0391 membrane protein Rmet_0093                                   |                                                               |
| Rep1                                                                        | Op0028r | 1.58 | 1.05 | 0.32 | 0.51 | 2.54 | - | Rmet_0095 |       | 652 947 | Q1LS95 | Putative uncharacterized protein                                     |                                                               |
| Rep1                                                                        | Op0102r | 1.04 | 0.72 | 0.26 | 0.56 | 2.33 | - | Rmet_0360 |       | 21 27   | Q1LR10 | Carbon monoxide dehydrogenase subunit G                              |                                                               |
| Rep1                                                                        | Op0102r | 1.28 | 0.96 | 0.37 | 0.55 | 1.83 | - | Rmet_0364 |       | 76      | NF/NF  | Q1LRH6                                                               | Xanthine dehydrogenase, molybdenum binding subunit apoprotein |
| Rep1                                                                        | Op0112r | 1.23 | 1.22 | 0.48 | 0.69 | 1.57 | - | Rmet_0409 | NeF   | NeF     | Q1LRD0 | 50S ribosomal protein L13                                            |                                                               |
| Rep1                                                                        | Op0227f | 1.28 | 0.71 | 0.44 | 0.67 | 1.37 | - | Rmet_0799 |       | 270 262 | Q1LQ91 | Binding-protein-dependent transport systems inner membrane component |                                                               |
| Rep1                                                                        | Op0412r | 0.95 | 0.65 | 0.50 | 0.62 | 1.36 | - | Rmet_1472 |       | 758 136 | Q1LNC1 | KAP P-loop                                                           |                                                               |
| Rep1                                                                        | Op0412r | 1.05 | 0.83 | 0.43 | 0.72 | 1.67 | - | Rmet_1473 |       | 255     | NF/NF  | Q1LNC0                                                               | Retron reverse transcriptase                                  |
| Rep1                                                                        | Op0412r | 1.10 | 1.18 | 0.43 | 0.99 | 1.56 | - | Rmet_1474 | NeF   | NeF     | Q1LNB9 | Putative uncharacterized protein                                     |                                                               |
| Rep1                                                                        | Op0489f | 1.01 | 1.32 | 0.47 | 0.79 | 1.66 | - | Rmet_1728 |       | 0 0     | Q46NG6 | General substrate transporter:Major facilitator superfamily MFS_1    |                                                               |
| Rep1                                                                        | Op0577f | 0.88 | 0.83 | 0.49 | 0.74 | 1.76 | - | Rmet_1982 | NF/NF |         | 34     | Q1LLW5                                                               | Putative uncharacterized protein                              |



|                                                                                |         |      |      |      |       |        |              |           |       |        |                                                                            |                                                             |
|--------------------------------------------------------------------------------|---------|------|------|------|-------|--------|--------------|-----------|-------|--------|----------------------------------------------------------------------------|-------------------------------------------------------------|
| Rep1                                                                           | Op0635f | 1.21 | 1.26 | 0.34 | 0.55  | 1.71 - | Rmet_2218    | 141       | NF/NF | Q1LL79 | Luciferase-like protein                                                    |                                                             |
| Rep1                                                                           | Op0662r | 0.85 | 0.90 | 0.49 | 0.87  | 1.55 - | Rmet_2342    | 249       | 24    | A0H9A7 | AAA ATPase, central region                                                 |                                                             |
| Rep1                                                                           | Op0662r | 1.14 | 0.86 | 0.45 | 0.60  | 1.74 - | Rmet_2344    | 133       | 170   | Q8GQ54 | Putative excisionase                                                       |                                                             |
| Rep1                                                                           | Op0664r | 0.96 | 0.85 | 0.38 | 0.60  | 1.86 - | Rmet_2363    | 189       | 218   | Q8GQ73 | Putative uncharacterized protein ORF C37                                   |                                                             |
| Rep1                                                                           | Op0754r | 1.28 | 1.09 | 0.43 | 0.60  | 1.88 - | Rmet_2658    | 0         | 0     | Q0K7X0 | Predicted signal transduction protein containingPAS, GGDEF and EAL domains |                                                             |
| Rep1                                                                           | Op0757f | 1.18 | 0.81 | 0.50 | 0.56  | 1.36 - | Rmet_2683    | 257       | NF/NF | Q1LJX0 | Putative transmembrane protein                                             |                                                             |
| Rep1                                                                           | Op0815f | 0.92 | 0.77 | 0.39 | 0.71  | 1.71 - | Rmet_2897    | 31        | NF/NF | Q1LJA6 | Putative uncharacterized protein                                           |                                                             |
| Rep1                                                                           | Op0868r | 1.54 | 1.08 | 0.38 | 0.81  | 1.73 - | Rmet_3085    | NeF       | NeF   | Q1LIR9 | Alcohol dehydrogenase, zinc-binding                                        |                                                             |
| Rep1                                                                           | Op0869f | 1.27 | 1.05 | 0.17 | 0.52  | 4.31 - | Rmet_3086    | 135       | 151   | Q1LIR8 | Uncharacterized protein UPF0065                                            |                                                             |
| Rep1                                                                           | Op0870r | 1.17 | 1.05 | 0.25 | 0.63  | 2.09   | <i>nrdB</i>  | Rmet_3087 | 616   | 535    | Q1LIR7                                                                     | Ribonucleotide reductase                                    |
| Rep1                                                                           | Op0896r | 0.98 | 0.99 | 0.50 | 0.63  | 1.46 - | Rmet_3188    | 48        | NF/NF | Q1LIG6 | Peptidase M61                                                              |                                                             |
| Rep1                                                                           | Op0950r | 0.64 | 0.85 | 0.46 | 0.76  | 1.25 - | Rmet_3428    | 656       | 789   | Q1LHS6 | Transport-associated                                                       |                                                             |
| Rep2                                                                           | Op1007r | 1.12 | 0.91 | 0.45 | 0.71  | 1.77 - | Rmet_3618    | 950       | 1189  | Q1LH86 | OsmC-like protein                                                          |                                                             |
| Rep2                                                                           | Op1007r | 1.10 | 1.25 | 0.29 | 0.71  | 2.66 - | Rmet_3619    | NeF       | NeF   | Q1LH85 | Transcriptional regulator, MarR family                                     |                                                             |
| Rep2                                                                           | Op1009r | 1.08 | 1.04 | 0.45 | 0.66  | 1.70 - | Rmet_3623    | NeF       | NeF   | Q1LH81 | Transcriptional regulator, MarR family                                     |                                                             |
| Rep2                                                                           | Op1160f | 1.31 | 1.04 | 0.41 | 0.93  | 1.43 - | Rmet_4119    | NeF       | NeF   | Q1LFU0 | Putative uncharacterized protein                                           |                                                             |
| Rep2                                                                           | Op1164f | 1.23 | 1.22 | 0.36 | 0.61  | 1.82 - | Rmet_4128    | NeF       | NeF   | Q1LFT1 | Putative uncharacterized protein                                           |                                                             |
| Rep2                                                                           | Op1190f | 1.03 | 1.06 | 0.40 | 0.70  | 1.91 - | Rmet_4198    | NeF       | NeF   | Q1LFL1 | Transcriptional regulator, PadR family                                     |                                                             |
| Rep2                                                                           | Op1279r | 1.17 | 1.25 | 0.39 | 0.57  | 1.69 - | Rmet_4490    | NeF       | NeF   | Q1LES1 | Putative uncharacterized protein                                           |                                                             |
| Rep2                                                                           | Op1279r | 1.20 | 1.19 | 0.30 | 0.68  | 2.67 - | Rmet_4493    | 0         | 0     | Q1LER8 | Putative uncharacterized protein                                           |                                                             |
| Rep2                                                                           | Op1341r | 1.10 | 1.41 | 0.36 | 0.76  | 2.04 - | Rmet_4644    | 75        | NF/NF | Q1LEC0 | Carboxymuconolactone decarboxylase                                         |                                                             |
| Rep2                                                                           | Op1425r | 0.91 | 1.09 | 0.45 | 0.68  | 1.59 - | Rmet_4876    | 34        | NF/NF | Q1LDN8 | Uncharacterized protein UPF0065                                            |                                                             |
| Rep2                                                                           | Op1461r | 1.19 | 1.08 | 0.43 | 0.61  | 1.70 - | Rmet_4979    | NeF       | NeF   | Q1LDD5 | Putative uncharacterized protein                                           |                                                             |
| Rep2                                                                           | Op1513r | 0.96 | 1.26 | 0.41 | 0.80  | 2.04 - | Rmet_5133    | 32        | 91    | Q1LCY4 | Acyl-CoA dehydrogenase-like protein                                        |                                                             |
| Rep2                                                                           | Op1579r | 1.37 | 1.51 | 0.49 | 0.57  | 0.63 - | Rmet_5333    | NeF       | NeF   | Q1LCD4 | Putative uncharacterized protein                                           |                                                             |
| Rep2                                                                           | Op1590f | 0.81 | 1.17 | 0.50 | 0.84  | 1.74 - | Rmet_5352    | NeF       | NeF   | Q1LCB5 | Putative uncharacterized protein                                           |                                                             |
| Rep2                                                                           | Op1645r | 1.22 | 1.42 | 0.38 | 0.52  | 1.31 - | Rmet_5533    | NeF       | NeF   | Q1LBT4 | Nitroreductase                                                             |                                                             |
| Rep2                                                                           | Op1645r | 0.77 | 0.87 | 0.47 | 0.66  | 1.65 - | Rmet_5534    | NeF       | NeF   | Q1LBT3 | 2-nitropropane dioxygenase, NPD                                            |                                                             |
| <b>VC. Up-regulated in Q(EDTA:Δ7/AE104) AND Up-regulated in Q(Zn:Δ7/AE104)</b> |         |      |      |      |       |        |              |           |       |        |                                                                            |                                                             |
| Rep1                                                                           | Op0032r | 1.32 | 1.09 | 2.09 | 0.42  | 0.73   | <i>zur</i>   | Rmet_0128 | 77    | 102    | Q1LS62                                                                     | Putative ferric uptake regulator, FUR family                |
| <b>aut-region 1</b>                                                            |         |      |      |      |       |        |              |           |       |        |                                                                            |                                                             |
| Rep1                                                                           | Op0421f | 0.98 | 0.95 | 2.46 | 2.22  | 1.02 - | Rmet_1491    | 154       | NF/NF | Q6SKD6 | Transposase                                                                |                                                             |
| Rep1                                                                           | Op0422r | 0.93 | 0.79 | 3.17 | 2.00  | 0.95 - | Rmet_1498    | NF/NF     | 169   | Q1LN95 | von Willebrand factor, type A                                              |                                                             |
| Rep1                                                                           | Op0422r | 1.08 | 0.86 | 5.10 | 2.68  | 0.96   | <i>cbbQ</i>  | Rmet_1499 | NF/NF | 433    | Q1LN94                                                                     | ATPase associated with various cellular activities, AAA_5   |
| Rep1                                                                           | Op0422r | 0.86 | 0.66 | 2.42 | 1.49  | 0.97   | <i>cbbS</i>  | Rmet_1500 | NF/NF | 1689   | Q1LN93                                                                     | Ribulose bisphosphate carboxylase small chain               |
| Rep1                                                                           | Op0422r | 0.90 | 0.66 | 2.41 | 1.63  | 1.09   | <i>rbcL</i>  | Rmet_1501 | 70    | 6269   | Q1LN92                                                                     | Ribulose bisphosphate carboxylase large chain               |
| Rep1                                                                           | Op0423f | 1.28 | 1.33 | 5.86 | 8.53  | 1.26 - | Rmet_1502    | NF/NF     | 290   | Q1LN91 | Transcriptional regulator, LysR family                                     |                                                             |
| Rep1                                                                           | Op0423f | 1.07 | 1.08 | 2.27 | 2.27  | 1.00 - | Rmet_1503    | NF/NF     | NF/NQ | Q9RBF5 | Ralstonia eutropha insertion sequence IS1090                               |                                                             |
| Rep1                                                                           | Op0424r | 1.04 | 1.10 | 2.56 | 2.84  | 1.12 - | Rmet_1505    | 0         | 0     | Q1LN88 | ISSod11, transposase                                                       |                                                             |
| Rep1                                                                           | Op0425f | 1.75 | 0.90 | 6.87 | 5.60  | 0.64   | <i>cbbF2</i> | Rmet_1511 | NF/NF | 237    | Q1LN82                                                                     | D-fructose 1,6-bisphosphatase                               |
| Rep1                                                                           | Op0425f | 1.42 | 1.27 | 2.26 | 2.27  | 0.83   | <i>cbbP</i>  | Rmet_1512 | NF/NF | 531    | Q1LN81                                                                     | Phosphoribulokinase                                         |
| Rep1                                                                           | Op0425f | 1.54 | 1.41 | 3.54 | 2.71  | 0.63   | <i>cbbT1</i> | Rmet_1513 | NF/NF | 327    | Q1LN80                                                                     | Transketolase                                               |
| Rep1                                                                           | Op0425f | 1.48 | 1.14 | 3.50 | 2.81  | 0.79   | <i>cbbZ1</i> | Rmet_1514 | 163   | 120    | Q1LN79                                                                     | Phosphoglycolate phosphatase                                |
| Rep1                                                                           | Op0425f | 1.68 | 1.16 | 3.09 | 2.41  | 0.85   | <i>cbbG1</i> | Rmet_1515 | 62    | 573    | Q1LN78                                                                     | Glyceraldehyde-3-phosphate dehydrogenase                    |
| Rep1                                                                           | Op0425f | 1.83 | 1.00 | 6.90 | 2.48  | 0.47 - | Rmet_1517    | NF/NF     | 61    | Q1LN76 | HAD-superfamily hydrolase subfamily IA, variant 3                          |                                                             |
| Rep1                                                                           | Op0425f | 1.30 | 1.40 | 3.36 | 3.39  | 0.93   | <i>cbbA2</i> | Rmet_1518 | 68    | 191    | Q1LN75                                                                     | Fructose-bisphosphate aldolase                              |
| Rep1                                                                           | Op0425f | 1.25 | 1.14 | 2.04 | 2.23  | 1.06   | <i>pykA2</i> | Rmet_1519 | NeF   | NeF    | Q1LN74                                                                     | Pyruvate kinase                                             |
| Rep1                                                                           | Op0425f | 1.38 | 0.97 | 2.44 | 2.48  | 0.96   | <i>cbbJ1</i> | Rmet_1520 | NF/NF | 101    | Q1LN73                                                                     | Triosephosphate isomerase                                   |
| Rep1                                                                           | Op0425f | 1.49 | 1.23 | 6.39 | 5.92  | 0.81   | <i>cbbl1</i> | Rmet_1521 | NF/NF | 76     | Q1LN72                                                                     | Ribose-5-phosphate isomerase                                |
| Rep1                                                                           | Op0425f | 1.25 | 1.26 | 5.32 | 7.88  | 1.19   | <i>hoxF</i>  | Rmet_1522 | NF/NF | 1694   | Q1LN71                                                                     | Respiratory-chain NADH dehydrogenase domain, 51 kDa subunit |
| Rep1                                                                           | Op0425f | 1.12 | 1.30 | 9.79 | 13.64 | 1.36   | <i>hoxU</i>  | Rmet_1523 | NF/NF | 1098   | Q1LN70                                                                     | Ferredoxin                                                  |

|                                                                                   |         |      |      |       |       |      |              |           |       |       |        |                                                                       |
|-----------------------------------------------------------------------------------|---------|------|------|-------|-------|------|--------------|-----------|-------|-------|--------|-----------------------------------------------------------------------|
| Rep1                                                                              | Op0425f | 0.93 | 1.23 | 9.52  | 16.24 | 1.64 | <i>hoxY</i>  | Rmet_1524 | NF/NF | 1855  | Q1LN69 | NADH ubiquinone oxidoreductase, 20 kDa subunit                        |
| Rep1                                                                              | Op0425f | 1.15 | 1.38 | 11.69 | 16.24 | 1.34 | <i>hoxH</i>  | Rmet_1525 | 34    | 4611  | Q1LN68 | Nickel-dependent hydrogenase, large subunit                           |
| Rep1                                                                              | Op0425f | 0.96 | 1.21 | 9.28  | 15.52 | 1.62 | -            | Rmet_1526 | NF/NF | 1766  | Q1LN67 | HoxW protein                                                          |
| Rep1                                                                              | Op0425f | 1.25 | 1.19 | 10.69 | 15.53 | 1.30 | -            | Rmet_1527 | NF/NF | 8605  | Q1LN66 | Cyclic nucleotide-binding domain (CNMP-BD) protein                    |
| Rep1                                                                              | Op0425f | 1.36 | 1.21 | 4.83  | 7.60  | 1.20 | -            | Rmet_1528 | 0     | 0     | Q1LN65 | Alanine dehydrogenase/PNT-like protein                                |
| Rep1                                                                              | Op0426r | 1.21 | 1.26 | 2.48  | 4.58  | 1.19 | -            | Rmet_1529 | NF/NF | 373   | Q1LB62 | Integrase, catalytic region                                           |
| Rep1                                                                              | Op0427f | 1.28 | 1.11 | 2.53  | 2.04  | 0.85 | -            | Rmet_1530 | 0     | 0     | Q1LN63 | Alanine dehydrogenase/PNT-like protein                                |
| Rep1                                                                              | Op0427f | 0.89 | 0.95 | 6.59  | 15.93 | 1.85 | -            | Rmet_1534 | 0     | 0     | Q1LN59 | Putative uncharacterized protein                                      |
| Rep1                                                                              | Op0427f | 0.95 | 0.91 | 7.30  | 16.19 | 1.77 | <i>hypA2</i> | Rmet_1535 | NF/NF | 622   | Q1LN58 | Hydrogenase nickel insertion protein HypA                             |
| Rep1                                                                              | Op0427f | 0.81 | 0.62 | 6.92  | 9.84  | 1.49 | <i>hypB2</i> | Rmet_1536 | NF/NF | 5295  | Q1LN57 | Hydrogenase accessory protein HypB                                    |
| Rep1                                                                              | Op0427f | 1.13 | 1.04 | 8.42  | 14.59 | 1.54 | <i>hypF2</i> | Rmet_1537 | NF/NF | 504   | Q1LN56 | (NiFe) hydrogenase maturation protein HypF                            |
| Rep1                                                                              | Op0427f | 1.11 | 0.96 | 7.03  | 11.99 | 1.41 | <i>hpyC2</i> | Rmet_1538 | NeF   | NeF   | Q1LN55 | Hydrogenase assembly chaperone hpyC/hupF                              |
| Rep1                                                                              | Op0427f | 1.03 | 0.80 | 7.41  | 13.77 | 1.67 | <i>hypD2</i> | Rmet_1539 | NF/NF | 493   | Q1LN54 | Hydrogenase expression/formation protein HypD                         |
| Rep1                                                                              | Op0427f | 0.97 | 0.85 | 7.43  | 15.10 | 1.77 | <i>hypE2</i> | Rmet_1540 | NF/NF | 2965  | Q1LN53 | Hydrogenase expression/formation protein HypE                         |
| Rep1                                                                              | Op0427f | 1.01 | 0.87 | 7.31  | 14.07 | 1.72 | <i>hoxX</i>  | Rmet_1541 | NF/NF | 371   | Q1LN52 | Formyl transferase-like protein                                       |
| Rep1                                                                              | Op0427f | 1.18 | 1.10 | 8.24  | 17.07 | 1.61 | <i>hoxA'</i> | Rmet_1542 | 608   | 240   | Q1LN51 | Response regulator receiver domain protein (CheY-like)                |
| Rep1                                                                              | Op0428r | 1.25 | 1.25 | 2.83  | 3.97  | 1.19 | -            | Rmet_1543 | NF/NQ | NF/NF | Q1LN50 | Stress responsive alpha-beta barrel                                   |
| Rep1                                                                              | Op0430r | 1.04 | 1.21 | 2.56  | 2.43  | 0.78 | -            | Rmet_1545 | NeF   | NeF   | Q1LN48 | Putative uncharacterized protein                                      |
| Rep2                                                                              | Op1724f | 1.35 | 1.32 | 3.39  | 5.08  | 1.17 | -            | Rmet_5754 | 0     | 0     | Q1LB63 | Fumarate hydratase, class II                                          |
| <b>VD. Not regulated in Q(EDTA:Δ7/AE104) AND Up-regulated in Q(Zn:Δ7/AE104)</b>   |         |      |      |       |       |      |              |           |       |       |        |                                                                       |
| Rep1                                                                              | Op0397f | 0.91 | 1.66 | 1.58  | 2.12  | 1.52 | -            | Rmet_1418 | 133   | 108   | Q1LNH5 | Putative integral membrane protein                                    |
| Rep1                                                                              | Op0425f | 1.30 | 0.99 | 1.85  | 2.62  | 1.02 | <i>ccbE1</i> | Rmet_1510 | NF/NF | 32    | Q1LN83 | Ribulose-5-phosphate 3-epimerase                                      |
| Rep1                                                                              | Op0431f | 0.93 | 1.26 | 1.79  | 2.38  | 1.08 | -            | Rmet_1546 | NeF   | NeF   | Q1LN47 | Transcriptional regulator, LysR family                                |
| Rep1                                                                              | Op0813f | 1.17 | 1.78 | 1.15  | 2.07  | 1.26 | -            | Rmet_2894 | 962   | 840   | Q1LJA9 | Cold-shock DNA-binding protein family                                 |
| Rep2                                                                              | Op1091r | 1.31 | 1.86 | 1.12  | 2.25  | 1.19 | -            | Rmet_3903 | NeF   | NeF   | Q1LGF5 | Putative uncharacterized protein                                      |
| Rep2                                                                              | Op1259r | 1.24 | 1.31 | 1.89  | 2.40  | 0.85 | -            | Rmet_4417 | 0     | 0     | Q1LEZ4 | Uncharacterized protein UPF0065                                       |
| <b>VE. Not regulated in Q(EDTA:Δ7/AE104) AND down-regulated in Q(Zn:Δ7/AE104)</b> |         |      |      |       |       |      |              |           |       |       |        |                                                                       |
| Rep1                                                                              | Op0047f | 1.85 | 1.08 | 1.53  | 0.49  | 0.78 | <i>betA1</i> | Rmet_0159 | NeF   | NeF   | Q1LS31 | Glucose-methanol-choline oxidoreductase                               |
| Rep1                                                                              | Op0098r | 1.99 | 0.99 | 1.60  | 0.45  | 0.55 | -            | Rmet_0351 | 469   | 14    | Q1LR19 | Transcriptional regulator, TetR family                                |
| Rep1                                                                              | Op0226r | 1.69 | 1.15 | 1.06  | 0.43  | 0.73 | -            | Rmet_0795 | NeF   | NeF   | Q1LQ95 | Inner-membrane translocator                                           |
| Rep1                                                                              | Op0228r | 1.34 | 0.91 | 0.51  | 0.46  | 1.17 | -            | Rmet_0803 | NeF   | NeF   | Q1LQ87 | Putative uncharacterized protein                                      |
| Rep1                                                                              | Op0490r | 1.44 | 1.18 | 1.19  | 0.49  | 0.59 | -            | Rmet_1731 | 64    | NF/NF | Q1LML6 | Putative uncharacterized protein                                      |
| Rep1                                                                              | Op0506r | 1.57 | 0.94 | 1.47  | 0.49  | 0.60 | -            | Rmet_1765 | 214   | NF/NF | Q1LMI2 | Putative uncharacterized protein                                      |
| Rep1                                                                              | Op0655f | 1.48 | 1.32 | 1.45  | 0.49  | 0.55 | -            | Rmet_2293 | NF/NF | 117   | Q8GQ05 | Putative uncharacterized protein ORF C106                             |
| Rep1                                                                              | Op0655f | 1.84 | 0.74 | 1.42  | 0.49  | 0.65 | -            | Rmet_2294 | 53    | NF/NF | Q8GQ06 | Putative uncharacterized protein ORF C105                             |
| Rep1                                                                              | Op0661f | 1.90 | 1.14 | 1.66  | 0.47  | 0.55 | -            | Rmet_2322 | NeF   | NeF   | Q1LKX7 | Putative uncharacterized protein                                      |
| Rep1                                                                              | Op0662r | 1.77 | 0.84 | 0.67  | 0.49  | 1.36 | -            | Rmet_2343 | 43    | 105   | Q8GQ53 | Putative uncharacterized protein ORF C57                              |
| Rep1                                                                              | Op0663f | 1.43 | 0.96 | 0.88  | 0.45  | 0.80 | -            | Rmet_2354 | NeF   | NeF   | Q8GQ64 | Putative uncharacterized protein ORF C46                              |
| Rep1                                                                              | Op0701f | 1.62 | 1.08 | 1.40  | 0.40  | 0.48 | -            | Rmet_2536 | NeF   | NeF   | Q1LKB3 | L-carnitine dehydratase/bile acid-inducible protein F                 |
| Rep1                                                                              | Op0709f | 1.08 | 0.54 | 0.60  | 0.46  | 0.59 | -            | Rmet_2564 | 418   | 593   | Q1LK85 | DEAD/DEAH box helicase-like protein                                   |
| Rep1                                                                              | Op0730r | 1.57 | 0.61 | 1.46  | 0.49  | 0.60 | <i>rpsU2</i> | Rmet_2609 | 160   | 119   | Q1LK40 | 30S ribosomal protein S21 2                                           |
| Rep1                                                                              | Op0784r | 1.77 | 0.63 | 1.47  | 0.46  | 0.53 | <i>cobT</i>  | Rmet_2785 | 317   | 340   | Q1LJL8 | Nicotinate-nucleotide-dimethylbenzimidazole phosphoribosyltransferase |
| Rep1                                                                              | Op0804r | 1.35 | 0.70 | 1.59  | 0.39  | 0.69 | <i>hutI</i>  | Rmet_2852 | NeF   | NeF   | Q1LJF1 | Imidazolonepropionase                                                 |
| Rep1                                                                              | Op0836r | 1.84 | 0.79 | 1.75  | 0.44  | 0.50 | -            | Rmet_2969 | 79    | NF/NF | Q1LJ34 | Putative uncharacterized protein                                      |
| Rep1                                                                              | Op0846r | 1.63 | 1.09 | 1.53  | 0.49  | 0.57 | <i>hmzB</i>  | Rmet_3012 | NeF   | NeF   | Q1LIZ1 | Secretion protein HlyD                                                |
| Rep1                                                                              | Op0974r | 1.94 | 1.11 | 1.73  | 0.44  | 0.50 | -            | Rmet_3514 | NeF   | NeF   | Q1LHJ0 | Putative uncharacterized protein                                      |
| Rep1                                                                              | Op0987f | 1.91 | 1.16 | 1.59  | 0.48  | 0.54 | -            | Rmet_3558 | NeF   | NeF   | Q1LHE6 | Na <sup>+</sup> /solute symporter                                     |
| Rep2                                                                              | Op1073r | 1.93 | 1.05 | 1.76  | 0.45  | 0.48 | -            | Rmet_3862 | NeF   | NeF   | Q1LGJ6 | Lysine exporter protein (LYSE/YGGA)                                   |
| Rep2                                                                              | Op1115r | 1.69 | 1.31 | 1.19  | 0.48  | 0.70 | <i>livM4</i> | Rmet_3979 | NeF   | NeF   | Q1LG79 | Inner-membrane translocator                                           |
| Rep2                                                                              | Op1169r | 1.74 | 1.09 | 1.46  | 0.47  | 0.62 | -            | Rmet_4145 | 455   | 418   | Q1LFR4 | L-carnitine dehydratase/bile acid-inducible protein F                 |
| Rep2                                                                              | Op1175r | 1.68 | 0.68 | 1.51  | 0.45  | 0.55 | -            | Rmet_4171 | 103   | 21    | Q1LFN8 | Glycosyl transferase, family 2                                        |

|      |         |      |      |      |      |      |             |           |       |       |        |                                                      |
|------|---------|------|------|------|------|------|-------------|-----------|-------|-------|--------|------------------------------------------------------|
| Rep2 | Op1207r | 1.74 | 1.27 | 1.61 | 0.45 | 0.54 | -           | Rmet_4260 | NeF   | NeF   | Q1LFF0 | Pirin-like protein                                   |
| Rep2 | Op1217r | 1.96 | 0.91 | 1.46 | 0.42 | 0.68 | -           | Rmet_4283 | NeF   | NeF   | Q1LFC7 | Putative uncharacterized protein                     |
| Rep2 | Op1276f | 1.80 | 0.99 | 1.50 | 0.44 | 0.51 | -           | Rmet_4473 | NF/NF | NF/NF | Q7X3A9 | Putative resolvase                                   |
| Rep2 | Op1297r | 1.75 | 1.14 | 1.76 | 0.43 | 0.66 | -           | Rmet_4532 | NeF   | NeF   | Q1LEM9 | von Willebrand factor, type A                        |
| Rep2 | Op1303r | 1.85 | 1.05 | 1.78 | 0.49 | 0.50 | -           | Rmet_4547 | 30    | NF/NF | Q1LEL4 | Putative outer membrane porin signal peptide protein |
| Rep2 | Op1419r | 1.46 | 1.11 | 1.25 | 0.46 | 0.56 | -           | Rmet_4865 | NeF   | NeF   | Q1LDP9 | RND efflux system, outer membrane lipoprotein, NodT  |
| Rep2 | Op1457r | 1.55 | 0.93 | 1.16 | 0.46 | 0.77 | -           | Rmet_4960 | 147   | 100   | Q1LDF4 | Pili assembly chaperone                              |
| Rep2 | Op1614f | 1.31 | 1.08 | 0.78 | 0.42 | 0.65 | -           | Rmet_5426 | NeF   | NeF   | Q1LC41 | Putative uncharacterized protein                     |
| Rep2 | Op1619r | 1.94 | 1.08 | 1.85 | 0.48 | 0.52 | -           | Rmet_5444 | NeF   | NeF   | Q1LC23 | FAD dependent oxidoreductase                         |
| Rep2 | Op1747r | 1.92 | 0.91 | 1.85 | 0.45 | 0.45 | -           | Rmet_5800 | 173   | 295   | Q1LB17 | 6-phosphogluconolactonase                            |
| Rep2 | Op1777r | 1.71 | 1.00 | 1.45 | 0.41 | 0.62 | <i>leuD</i> | Rmet_5867 | NeF   | NeF   | Q1LAV0 | 3-isopropylmalate dehydratase, small subunit         |
| Rep2 | Op1792f | 1.54 | 0.87 | 1.54 | 0.47 | 0.58 | -           | Rmet_5907 | NeF   | NeF   | Q1LAR0 | Putative uncharacterized protein                     |

**VF. Not regulated in Q(EDTA:Δ7/AE104) AND not regulated in Q(Zn:Δ7/AE104)**

**VF1. Down-regulated in Q(AE104:EDTA/Zn)**

|      |         |      |      |      |      |      |               |           |       |       |        |                                                            |
|------|---------|------|------|------|------|------|---------------|-----------|-------|-------|--------|------------------------------------------------------------|
| Rep1 | Op0031f | 1.29 | 0.95 | 1.11 | 0.59 | 0.28 | <i>bioA</i>   | Rmet_0114 | 1808  | 1704  | Q1LS76 | Adenosylmethionine-8-amino-7-oxononoate aminotransferase   |
| Rep1 | Op0031f | 1.37 | 1.01 | 1.16 | 0.64 | 0.26 | <i>bioF</i>   | Rmet_0115 | 1589  | 1446  | Q1LS75 | 8-amino-7-oxononoate synthase                              |
| Rep1 | Op0031f | 1.32 | 1.11 | 1.14 | 0.66 | 0.24 | <i>bioD</i>   | Rmet_0116 | 1534  | 1546  | Q1LS74 | Dethiobiotin synthase                                      |
| Rep1 | Op0031f | 1.25 | 0.66 | 1.06 | 0.52 | 0.23 | <i>bioB</i>   | Rmet_0117 | 4380  | 4453  | Q1LS73 | Biotin synthase                                            |
| Rep1 | Op0031f | 1.29 | 0.75 | 1.09 | 0.80 | 0.29 | <i>ycdW</i>   | Rmet_0118 | 1842  | 2189  | Q1LS72 | D-isomer specific 2-hydroxyacid dehydrogenase, NAD-binding |
| Rep1 | Op0031f | 1.43 | 0.86 | 1.23 | 1.00 | 0.41 | -             | Rmet_0119 | 589   | 631   | Q1LS71 | YbaK/prolyl-tRNA synthetase associated region              |
| Rep1 | Op0031f | 1.28 | 0.84 | 1.13 | 0.95 | 0.46 | -             | Rmet_0120 | 34    | 32    | Q1LS70 | Putative uncharacterized protein                           |
| Rep1 | Op0072r | 1.21 | 0.81 | 1.10 | 1.12 | 0.43 | -             | Rmet_0249 | 251   | 249   | Q1LRU1 | UBA/THIF-type NAD/FAD binding fold                         |
| Rep1 | Op0075f | 1.19 | 0.87 | 1.45 | 0.96 | 0.46 | <i>coxA</i>   | Rmet_0262 | 361   | 88    | Q1LR58 | Cytochrome c oxidase, subunit I                            |
| Rep1 | Op0119f | 1.69 | 1.46 | 1.09 | 0.74 | 0.35 | -             | Rmet_0457 | 26    | NF/NF | Q1LR83 | Aminoglycoside phosphotransferase                          |
| Rep1 | Op0149f | 0.94 | 0.65 | 0.94 | 1.09 | 0.43 | -             | Rmet_0539 | 6581  | 7551  | Q1LR01 | Superoxide dismutase                                       |
| Rep1 | Op0259f | 1.26 | 1.06 | 0.86 | 1.14 | 0.48 | -             | Rmet_0894 | 113   | 71    | Q1LPZ6 | Transcriptional regulator, LysR family                     |
| Rep1 | Op0263f | 1.41 | 1.96 | 1.48 | 1.14 | 0.45 | <i>ilvC</i>   | Rmet_0913 | 5505  | 6086  | Q1LPX7 | Ketol-acid reductoisomerase                                |
| Rep1 | Op0267f | 1.65 | 1.22 | 0.92 | 0.68 | 0.39 | <i>nuoH</i>   | Rmet_0934 | 538   | 200   | Q1LPV6 | NADH-quinone oxidoreductase subunit H                      |
| Rep1 | Op0267f | 1.33 | 1.03 | 0.95 | 0.91 | 0.45 | <i>nuoI</i>   | Rmet_0935 | 920   | 584   | Q1LPV5 | NADH-quinone oxidoreductase subunit I                      |
| Rep1 | Op0267f | 1.27 | 0.92 | 0.92 | 0.91 | 0.50 | <i>nuoJ</i>   | Rmet_0936 | 433   | NF/NF | Q1LPV4 | NADH-ubiquinone/plastoquinone oxidoreductase, chain 6      |
| Rep1 | Op0403f | 1.38 | 1.75 | 0.88 | 0.89 | 0.49 | <i>tsf</i>    | Rmet_1436 | 4224  | 4521  | Q1LNF7 | Elongation factor Ts                                       |
| Rep1 | Op0525f | 1.24 | 0.74 | 1.20 | 0.63 | 0.50 | -             | Rmet_1809 | 311   | 362   | Q1LMD8 | Thiamine pyrophosphate enzyme-like TPP-binding             |
| Rep1 | Op0570r | 1.17 | 1.12 | 0.77 | 0.86 | 0.37 | -             | Rmet_1946 | NeF   | NeF   | Q1LM01 | Putative transmembrane protein                             |
| Rep1 | Op0649f | 1.20 | 0.94 | 0.89 | 0.91 | 0.47 | <i>fumA</i>   | Rmet_2273 | 3807  | 4273  | Q1LL24 | Fumarase                                                   |
| Rep1 | Op0649f | 1.25 | 0.77 | 0.88 | 1.23 | 0.47 | <i>muri</i>   | Rmet_2274 | 117   | 122   | Q1LL23 | Glutamate racemase                                         |
| Rep1 | Op0656r | 1.03 | 0.89 | 0.87 | 0.80 | 0.20 | -             | Rmet_2299 | NeF   | NeF   | Q8GQ11 | Putative integral membrane protein / transporter           |
| Rep1 | Op0659f | 1.22 | 0.97 | 1.10 | 0.74 | 0.38 | <i>cadA</i>   | Rmet_2303 | 82    | NF/NF | A7HYL0 | Heavy metal translocating P-type ATPase                    |
| Rep1 | Op0843f | 1.49 | 1.16 | 1.30 | 0.96 | 0.49 | -             | Rmet_2997 | NeF   | NeF   | A9BTQ2 | Putative uncharacterized protein                           |
| Rep1 | Op0861f | 1.10 | 1.56 | 1.07 | 0.99 | 0.48 | <i>accB</i>   | Rmet_3064 | 2052  | 2600  | Q1LIU0 | Biotin carboxyl carrier protein                            |
| Rep1 | Op0969f | 1.39 | 1.27 | 1.11 | 0.68 | 0.40 | <i>gcvP</i>   | Rmet_3482 | 372   | 407   | Q1LHM2 | Glycine dehydrogenase [decarboxylating]                    |
| Rep1 | Op0979f | 1.33 | 1.66 | 1.25 | 1.08 | 0.49 | -             | Rmet_3538 | 5550  | 7535  | Q1LHG6 | HU family DNA-binding protein                              |
| Rep1 | Op0980r | 1.32 | 1.57 | 1.22 | 1.00 | 0.46 | -             | Rmet_3539 | NeF   | NeF   | Q1LHG5 | Putative uncharacterized protein                           |
| Rep2 | Op1008f | 0.93 | 1.38 | 0.55 | 1.28 | 0.18 | -             | Rmet_3620 | NF/NF | 118   | Q1LH84 | Peptidase S1C, Do                                          |
| Rep2 | Op1008f | 1.16 | 1.16 | 0.86 | 1.34 | 0.43 | -             | Rmet_3621 | NeF   | NeF   | Q1LH83 | Putative uncharacterized protein                           |
| Rep2 | Op1110f | 1.23 | 0.87 | 1.42 | 0.92 | 0.48 | -             | Rmet_3956 | NeF   | NeF   | Q1LGA2 | Cytochrome c oxidase, subunit I                            |
| Rep2 | Op1322f | 1.01 | 0.96 | 0.95 | 0.92 | 0.25 | <i>czcI2</i>  | Rmet_4595 | NeF   | NeF   | Q1LEG9 | Putative uncharacterized protein                           |
| Rep2 | Op1322f | 1.16 | 0.80 | 0.95 | 0.77 | 0.02 | <i>czcC2</i>  | Rmet_4596 | 147   | 72    | Q1LEG8 | Outer membrane efflux protein                              |
| Rep2 | Op1322f | 1.72 | 0.90 | 1.41 | 1.04 | 0.10 | <i>czcB2'</i> | Rmet_4597 | 0     | 0     | Q1LEG7 | Secretion protein HlyD                                     |
| Rep2 | Op1323r | 1.45 | 0.90 | 1.13 | 1.06 | 0.13 | -             | Rmet_4598 | NF/NQ | NF/NF | B1LRU9 | Tn3 family transposase                                     |
| Rep2 | Op1408f | 1.70 | 1.18 | 1.66 | 0.85 | 0.47 | <i>qseC</i>   | Rmet_4830 | 111   | NF/NF | Q1LDT4 | Sensor protein                                             |
| Rep2 | Op1449r | 1.29 | 1.58 | 1.06 | 0.68 | 0.46 | -             | Rmet_4936 | NeF   | NeF   | Q1LDH8 | Putative uncharacterized protein                           |

|                                             |         |      |      |      |      |                   |           |       |       |        |                                                        |
|---------------------------------------------|---------|------|------|------|------|-------------------|-----------|-------|-------|--------|--------------------------------------------------------|
| Rep2                                        | Op1478f | 1.59 | 1.24 | 1.38 | 0.63 | 0.49 -            | Rmet_5023 | NeF   | NeF   | Q1LD91 | AMP-dependent synthetase and ligase                    |
| Rep2                                        | Op1544f | 1.17 | 0.82 | 0.93 | 1.10 | 0.31 -            | Rmet_5231 | 75    | 102   | Q1LCN6 | Transcriptional regulator, ArsR family                 |
| Rep2                                        | Op1544f | 1.26 | 0.62 | 0.98 | 0.78 | 0.30 <i>cydA</i>  | Rmet_5232 | 53    | 28    | Q1LCN5 | Cytochrome bd ubiquinol oxidase, subunit I             |
| Rep2                                        | Op1544f | 1.11 | 0.76 | 0.86 | 0.76 | 0.25 <i>cydB</i>  | Rmet_5233 | NeF   | NeF   | Q1LCN4 | Cytochrome d ubiquinol oxidase, subunit II             |
| Rep2                                        | Op1544f | 1.43 | 0.69 | 1.19 | 0.94 | 0.36 -            | Rmet_5234 | NeF   | NeF   | Q1LCN3 | Putative uncharacterized protein                       |
| <b>VF2.Up-regulated in Q(AE104:EDTA/Zn)</b> |         |      |      |      |      |                   |           |       |       |        |                                                        |
| Rep1                                        | Op0027f | 1.24 | 1.40 | 0.53 | 0.93 | 2.16 -            | Rmet_0094 | 485   | 539   | Q1LS96 | Putative uncharacterized protein                       |
| Rep1                                        | Op0032r | 1.41 | 1.02 | 1.01 | 0.66 | 2.11 -            | Rmet_0123 | NeF   | NeF   | Q1LS67 | TonB-dependent receptor                                |
| Rep1                                        | Op0071f | 0.84 | 1.01 | 1.08 | 1.27 | 11.04 -           | Rmet_0247 | NeF   | NeF   | Q1LRU3 | BFD-like (2Fe-2S)-binding region                       |
| Rep1                                        | Op0088r | 1.74 | 0.87 | 1.19 | 0.68 | 3.11 -            | Rmet_0310 | 3865  | 3340  | Q1LRN0 | Peptidase C56, PfpI                                    |
| Rep1                                        | Op0109f | 0.74 | 0.66 | 1.03 | 1.14 | 3.72 <i>gdhA</i>  | Rmet_0398 | 343   | 628   | Q1LRE2 | Glu/Leu/Phe/Val dehydrogenase                          |
| Rep1                                        | Op0116r | 0.80 | 0.59 | 1.10 | 0.80 | 2.06 -            | Rmet_0421 | 5059  | 2156  | Q1LRB8 | Putative uncharacterized protein                       |
| Rep1                                        | Op0116r | 0.82 | 0.68 | 1.01 | 0.91 | 2.01 -            | Rmet_0422 | 4543  | 2044  | Q1LRB7 | Holliday junction ATP-dependent DNA helicase ruvB      |
| Rep1                                        | Op0159f | 0.93 | 0.77 | 1.33 | 0.95 | 2.25 <i>fabI</i>  | Rmet_0565 | 383   | 221   | Q1LQX5 | Enoyl-[acyl-carrier-protein] reductase (NADH)          |
| Rep1                                        | Op0159f | 0.90 | 0.90 | 1.32 | 0.93 | 2.03 -            | Rmet_0566 | NeF   | NeF   | Q1LQX4 | Putative uncharacterized protein                       |
| Rep1                                        | Op0239f | 1.35 | 1.26 | 1.21 | 0.94 | 38.18 -           | Rmet_0837 | 20    | NF/NF | Q1LQ53 | TonB-dependent siderophore receptor                    |
| Rep1                                        | Op0239f | 1.35 | 0.96 | 1.19 | 0.79 | 39.11 -           | Rmet_0838 | 58    | 67    | Q1LQ52 | PKHD-type hydroxylase Rmet_0838                        |
| Rep1                                        | Op0239f | 1.32 | 1.16 | 1.18 | 1.10 | 31.14 -           | Rmet_0839 | NeF   | NeF   | Q1LQ51 | FMN-dependent alpha-hydroxy acid dehydrogenase         |
| Rep1                                        | Op0251f | 0.74 | 1.17 | 1.03 | 0.86 | 2.28 -            | Rmet_0869 | 257   | 185   | Q1LQ21 | FAD dependent oxidoreductase                           |
| Rep1                                        | Op0295f | 1.19 | 1.17 | 0.72 | 1.05 | 2.64 -            | Rmet_1024 | 204   | 401   | Q1LPL6 | Transcriptional regulator, BadM/Rrf2 family            |
| Rep1                                        | Op0315f | 0.77 | 1.31 | 1.17 | 1.19 | 2.74 -            | Rmet_1092 | NeF   | NeF   | Q1LFA7 | Anion transporter                                      |
| Rep1                                        | Op0315f | 0.69 | 1.19 | 1.30 | 0.97 | 4.88 <i>adh</i>   | Rmet_1093 | 196   | 386   | Q1LPE7 | Alcohol dehydrogenase GroES-like protein               |
| Rep1                                        | Op0319f | 1.19 | 1.39 | 1.36 | 0.89 | 11.40 -           | Rmet_1105 | NeF   | NeF   | Q1LPD5 | Putative uncharacterized protein                       |
| Rep1                                        | Op0319f | 1.16 | 1.34 | 1.11 | 0.89 | 4.58 -            | Rmet_1106 | NeF   | NeF   | Q1LPD4 | PepSY-associated TM helix                              |
| Rep1                                        | Op0319f | 1.15 | 1.32 | 1.15 | 0.95 | 4.45 -            | Rmet_1107 | NeF   | NeF   | Q1LPD3 | Putative uncharacterized protein                       |
| Rep1                                        | Op0319f | 1.12 | 1.14 | 1.13 | 0.80 | 8.77 -            | Rmet_1108 | NeF   | NeF   | Q1LPD2 | TonB-dependent siderophore receptor                    |
| Rep1                                        | Op0320r | 0.88 | 1.13 | 0.99 | 0.93 | 6.25 -            | Rmet_1109 | NF/NF | NF/NF | Q1LPD1 | Putative uncharacterized protein                       |
| Rep1                                        | Op0320r | 0.74 | 1.20 | 0.95 | 0.90 | 5.29 <i>lysA</i>  | Rmet_1110 | NF/NF | NF/NF | Q1LPD0 | Orn/DAP/Arg decarboxylase 2                            |
| Rep1                                        | Op0320r | 0.93 | 1.33 | 1.14 | 0.96 | 9.21 <i>hpcH</i>  | Rmet_1111 | NF/NF | 45    | Q1LPC9 | HpcH/Hpal aldolase                                     |
| Rep1                                        | Op0320r | 0.75 | 1.33 | 1.03 | 0.93 | 5.10 -            | Rmet_1112 | 22    | NF/NF | Q1LPC8 | lucA/lucC                                              |
| Rep1                                        | Op0320r | 0.77 | 1.22 | 1.00 | 0.93 | 9.11 -            | Rmet_1113 | 221   | NF/NF | Q1LPC7 | lucA/lucC                                              |
| Rep1                                        | Op0320r | 0.78 | 1.03 | 0.94 | 0.67 | 7.45 -            | Rmet_1114 | NeF   | NeF   | Q1LPC6 | Major facilitator superfamily MFS_1                    |
| Rep1                                        | Op0320r | 0.83 | 1.14 | 1.04 | 0.94 | 9.34 -            | Rmet_1115 | NeF   | NeF   | Q1LPC5 | lucA/lucC                                              |
| Rep1                                        | Op0320r | 0.83 | 1.28 | 1.07 | 0.97 | 6.56 <i>ocd</i>   | Rmet_1116 | 299   | 373   | Q1LPC4 | Ornithine cyclodeaminase                               |
| Rep1                                        | Op0320r | 0.81 | 1.12 | 1.07 | 0.77 | 13.15 <i>cysK</i> | Rmet_1117 | NF/NF | NF/NF | Q44004 | Cysteine synthase                                      |
| Rep1                                        | Op0320r | 0.90 | 1.11 | 1.01 | 1.17 | 8.27 -            | Rmet_1118 | 209   | 84    | Q1LPC2 | TonB-dependent siderophore receptor                    |
| Rep1                                        | Op0320r | 1.12 | 0.82 | 1.11 | 0.78 | 3.15 <i>rsiA</i>  | Rmet_1119 | 1538  | NF/NF | Q1LPC1 | Putative FecR                                          |
| Rep1                                        | Op0320r | 0.95 | 0.91 | 0.85 | 0.94 | 5.17 <i>rpoI</i>  | Rmet_1120 | NeF   | NeF   | Q1LPC0 | Sigma-24 (FecI-like)                                   |
| Rep1                                        | Op0333f | 1.51 | 0.93 | 0.67 | 0.74 | 2.13 <i>thrS</i>  | Rmet_1160 | 1119  | 1126  | Q1LP80 | Threonyl-tRNA synthetase / Ser-tRNA(Thr) hydrolase     |
| Rep1                                        | Op0384r | 1.20 | 1.15 | 1.18 | 0.89 | 3.49 -            | Rmet_1365 | NeF   | NeF   | Q1LNM8 | PepSY-associated TM helix                              |
| Rep1                                        | Op0384r | 1.23 | 1.18 | 1.05 | 0.64 | 2.57 -            | Rmet_1366 | NeF   | NeF   | Q1LNM7 | Putative transmembrane protein                         |
| Rep1                                        | Op0384r | 1.41 | 1.10 | 1.18 | 0.68 | 2.06 -            | Rmet_1367 | NeF   | NeF   | Q1LNM6 | Putative lipoprotein transmembrane                     |
| Rep1                                        | Op0481f | 0.60 | 1.11 | 1.13 | 0.89 | 6.11 -            | Rmet_1695 | 197   | 291   | Q1LMQ0 | Putative uncharacterized protein                       |
| Rep1                                        | Op0481f | 0.61 | 1.12 | 1.19 | 0.88 | 3.40 -            | Rmet_1696 | 109   | 394   | Q1LMP9 | Putative uncharacterized protein                       |
| Rep1                                        | Op0481f | 0.70 | 1.23 | 0.96 | 1.03 | 3.35 -            | Rmet_1697 | NeF   | NeF   | Q1LMP8 | Sensor protein                                         |
| Rep1                                        | Op0481f | 0.75 | 1.27 | 1.15 | 1.05 | 3.50 -            | Rmet_1698 | NeF   | NeF   | Q1LMP7 | Two component transcriptional regulator, LuxR family   |
| Rep1                                        | Op0481f | 0.72 | 1.07 | 1.19 | 0.97 | 7.42 -            | Rmet_1699 | NeF   | NeF   | Q1LMP6 | Response regulator receiver domain protein (CheY-like) |
| Rep1                                        | Op0481f | 0.61 | 1.00 | 1.03 | 0.86 | 7.42 -            | Rmet_1700 | 343   | 167   | Q1LMP5 | Putative uncharacterized protein                       |
| Rep1                                        | Op0481f | 0.86 | 1.60 | 1.48 | 1.14 | 4.88 -            | Rmet_1701 | 434   | 166   | Q1LMP4 | Secretion protein HlyD                                 |
| Rep1                                        | Op0481f | 0.60 | 1.27 | 0.99 | 0.94 | 10.33 -           | Rmet_1702 | 226   | 37    | Q1LMP3 | Hydrophobe/amphiphile efflux-1 HAE1                    |
| Rep1                                        | Op0481f | 0.82 | 1.26 | 1.12 | 1.03 | 5.89 -            | Rmet_1703 | NeF   | NeF   | Q1LMP2 | RND efflux system, outer membrane lipoprotein, NodT    |

|      |         |      |      |      |      |                    |           |       |       |        |                                                     |
|------|---------|------|------|------|------|--------------------|-----------|-------|-------|--------|-----------------------------------------------------|
| Rep1 | Op0481f | 0.78 | 1.87 | 1.39 | 1.14 | 7.15 -             | Rmet_1704 | 392   | 156   | Q1LMP1 | Putative uncharacterized protein                    |
| Rep1 | Op0481f | 0.82 | 1.43 | 1.36 | 1.23 | 8.04 -             | Rmet_1706 | 408   | 312   | Q1LMN9 | Putative uncharacterized protein                    |
| Rep1 | Op0482r | 0.78 | 1.22 | 1.25 | 0.99 | 4.86 -             | Rmet_1707 | NeF   | NeF   | Q1LMN8 | Putative uncharacterized protein                    |
| Rep1 | Op0483f | 0.77 | 1.26 | 1.13 | 1.02 | 2.36 -             | Rmet_1709 | NeF   | NeF   | Q1LMN6 | Putative uncharacterized protein                    |
| Rep1 | Op0507f | 0.57 | 1.10 | 1.40 | 0.95 | 8.66 <i>gadB</i>   | Rmet_1766 | 1046  | 898   | Q1LMI1 | Glutamate decarboxylase                             |
| Rep1 | Op0519f | 1.13 | 0.95 | 1.41 | 1.12 | 2.09 -             | Rmet_1791 | 65    | 40    | Q1LMF6 | Secretion protein HlyD                              |
| Rep1 | Op0527f | 1.60 | 1.13 | 1.58 | 0.81 | 27.51 -            | Rmet_1819 | NeF   | NeF   | Q1LMC8 | TonB-dependent siderophore receptor                 |
| Rep1 | Op0527f | 1.70 | 0.95 | 1.41 | 1.00 | 3.25 <i>purT</i>   | Rmet_1820 | 1022  | 1078  | Q1LMC7 | Phosphoribosylglycinamide formyltransferase 2       |
| Rep1 | Op0555f | 0.86 | 1.29 | 1.36 | 0.82 | 4.49 -             | Rmet_1904 | NF/NF | 163   | Q1LM43 | Putative uncharacterized protein                    |
| Rep1 | Op0579f | 0.70 | 1.29 | 1.41 | 0.59 | 8.59 <i>asdA</i>   | Rmet_1984 | 3127  | 2969  | Q1LLW3 | Aminotransferase                                    |
| Rep1 | Op0579f | 0.63 | 1.11 | 1.24 | 0.89 | 6.77 -             | Rmet_1985 | 281   | 710   | Q1LLW2 | YidE/YbjL duplication                               |
| Rep1 | Op0580r | 0.55 | 0.87 | 0.98 | 0.95 | 4.13 -             | Rmet_1986 | NeF   | NeF   | Q1LLW1 | Putative uncharacterized protein                    |
| Rep1 | Op0651f | 0.92 | 0.76 | 0.95 | 0.86 | 13.58 -            | Rmet_2276 | NeF   | NeF   | Q1LL21 | Putative uncharacterized protein                    |
| Rep1 | Op0651f | 0.82 | 0.70 | 0.84 | 0.81 | 14.41 -            | Rmet_2277 | 44    | NF/NF | Q1LL20 | TonB-like protein                                   |
| Rep1 | Op0651f | 0.90 | 0.90 | 0.91 | 0.89 | 15.93 -            | Rmet_2278 | 445   | 173   | Q1LL19 | MotA/TolQ/ExbB proton channel                       |
| Rep1 | Op0651f | 1.00 | 1.01 | 0.99 | 1.14 | 15.38 -            | Rmet_2279 | 188   | 109   | Q1LL18 | Biopolymer transport protein ExbD/TolR              |
| Rep1 | Op0651f | 0.97 | 1.02 | 1.26 | 0.80 | 40.88 -            | Rmet_2280 | NF/NF | 48    | Q1LL17 | Putative uncharacterized protein                    |
| Rep1 | Op0652r | 0.96 | 0.65 | 0.88 | 0.76 | 2.82 -             | Rmet_2282 | NeF   | NeF   | Q1LL15 | Virulence protein                                   |
| Rep2 | Op1019r | 1.22 | 0.98 | 1.07 | 0.72 | 2.43 -             | Rmet_3649 | NeF   | NeF   | Q1LH55 | Putative uncharacterized protein                    |
| Rep2 | Op1026f | 1.89 | 1.63 | 1.37 | 1.48 | 2.05 <i>cheA</i>   | Rmet_3689 | 81    | NF/NF | Q1LH15 | CheA signal transduction histidine kinases          |
| Rep2 | Op1102f | 0.86 | 0.99 | 1.06 | 1.04 | 3.67 -             | Rmet_3941 | NeF   | NeF   | Q1LGB7 | Putative uncharacterized protein                    |
| Rep2 | Op1123r | 0.86 | 1.08 | 0.91 | 0.84 | 2.35 <i>rskA</i>   | Rmet_4000 | 31    | NF/NF | Q1LG58 | FecR family protein                                 |
| Rep2 | Op1123r | 1.18 | 1.08 | 1.41 | 0.82 | 3.10 <i>rpoK</i>   | Rmet_4001 | NeF   | NeF   | Q1LG57 | Sigma-24 (FecI-like)                                |
| Rep2 | Op1251r | 0.55 | 1.07 | 0.93 | 0.94 | 2.07 -             | Rmet_4400 | 2088  | 287   | Q1LF11 | Putative uncharacterized protein                    |
| Rep2 | Op1281r | 0.95 | 1.33 | 0.96 | 0.88 | 2.13 <i>rsjA</i>   | Rmet_4498 | 85    | 101   | Q1LER3 | Putative FecR                                       |
| Rep2 | Op1331r | 1.58 | 1.25 | 0.62 | 0.61 | 2.02 -             | Rmet_4619 | NeF   | NeF   | Q1LEE5 | RND efflux system, outer membrane lipoprotein, NodT |
| Rep2 | Op1357r | 0.75 | 0.81 | 1.07 | 1.00 | 2.03 -             | Rmet_4692 | NeF   | NeF   | Q1LE72 | Putative uncharacterized protein                    |
| Rep2 | Op1412f | 0.67 | 1.13 | 1.16 | 0.96 | 3.92 -             | Rmet_4847 | 58    | NF/NF | Q1LDR7 | YidE/YbjL duplication                               |
| Rep2 | Op1600f | 1.29 | 1.33 | 1.11 | 0.96 | 37.04 -            | Rmet_5373 | 72    | NF/NF | Q1LC94 | TonB-dependent receptor                             |
| Rep2 | Op1600f | 1.16 | 1.18 | 1.21 | 0.75 | 444.51 -           | Rmet_5374 | NeF   | NeF   | Q1LC93 | Putative uncharacterized protein                    |
| Rep2 | Op1600f | 1.44 | 1.13 | 1.11 | 0.76 | 144.27 -           | Rmet_5375 | NeF   | NeF   | Q1LC92 | Haemin-degrading                                    |
| Rep2 | Op1600f | 1.54 | 1.22 | 1.08 | 0.87 | 92.78 <i>hmuT</i>  | Rmet_5376 | NeF   | NeF   | Q1LC91 | Periplasmic binding protein                         |
| Rep2 | Op1600f | 1.53 | 1.23 | 1.23 | 0.81 | 280.57 <i>hmuU</i> | Rmet_5377 | NeF   | NeF   | Q1LC90 | Transport system permease protein                   |
| Rep2 | Op1600f | 1.71 | 1.29 | 1.26 | 0.94 | 25.44 <i>hmuV</i>  | Rmet_5378 | NeF   | NeF   | Q1LC89 | Hemin import ATP-binding protein hmuV               |
| Rep2 | Op1601r | 1.59 | 1.30 | 1.12 | 0.85 | 21.11 -            | Rmet_5379 | NeF   | NeF   | Q1LC88 | Short-chain dehydrogenase/reductase SDR             |
| Rep2 | Op1601r | 1.54 | 1.33 | 1.10 | 0.94 | 3.70 -             | Rmet_5380 | NeF   | NeF   | Q1LC87 | Putative uncharacterized protein                    |
| Rep2 | Op1608f | 0.59 | 1.09 | 0.96 | 0.78 | 2.14 -             | Rmet_5402 | 247   | 131   | Q1LC65 | Beta-lactamase-like protein                         |
| Rep2 | Op1610f | 0.62 | 1.14 | 1.19 | 0.77 | 2.08 -             | Rmet_5405 | 26    | NF/NF | Q1LC62 | Putative periplasmic protein                        |
| Rep2 | Op1610f | 0.70 | 1.17 | 1.19 | 1.04 | 3.24 -             | Rmet_5406 | 110   | NF/NF | Q1LC61 | Putative uncharacterized protein                    |
| Rep2 | Op1610f | 0.65 | 1.17 | 1.02 | 0.82 | 2.78 -             | Rmet_5408 | NeF   | NeF   | Q1LC59 | Outer membrane efflux protein                       |
| Rep2 | Op1610f | 0.62 | 1.16 | 0.98 | 0.85 | 2.62 -             | Rmet_5409 | 63    | 243   | Q1LC58 | Putative uncharacterized protein                    |
| Rep2 | Op1612f | 0.61 | 1.11 | 1.01 | 0.78 | 5.09 <i>aslA</i>   | Rmet_5416 | 543   | 351   | Q1LC51 | Sulfatase                                           |
| Rep2 | Op1628f | 0.74 | 0.71 | 0.80 | 1.01 | 2.41 -             | Rmet_5484 | 441   | 670   | Q1LBY3 | Putative uncharacterized protein                    |
| Rep2 | Op1660f | 0.65 | 1.04 | 1.04 | 1.14 | 13.87 -            | Rmet_5578 | 1738  | 759   | Q1LBN9 | Putative uncharacterized protein                    |
| Rep2 | Op1660f | 0.77 | 1.25 | 1.13 | 1.17 | 11.76 -            | Rmet_5579 | NF/NF | NF/NF | Q1LBN8 | Cytochrome B561                                     |
| Rep2 | Op1668f | 0.74 | 0.94 | 1.12 | 0.91 | 2.29 -             | Rmet_5600 | 94    | 113   | Q1LBL7 | Ankyrin                                             |
| Rep2 | Op1681r | 1.05 | 1.02 | 1.30 | 0.74 | 2.35 -             | Rmet_5636 | NeF   | NeF   | Q1LB11 | Flavodoxin/nitric oxide synthase                    |
| Rep2 | Op1681r | 0.61 | 1.11 | 1.13 | 0.93 | 2.28 -             | Rmet_5637 | NeF   | NeF   | Q1LB10 | AppE-like lipoprotein                               |
| Rep2 | Op1681r | 0.77 | 1.03 | 1.14 | 0.95 | 3.14 -             | Rmet_5638 | 285   | 293   | Q1LBH9 | Putative uncharacterized protein                    |
| Rep2 | Op1681r | 0.76 | 1.04 | 1.05 | 0.91 | 2.27 -             | Rmet_5639 | 139   | 84    | Q1LBH8 | Putative uncharacterized protein                    |
| Rep2 | Op1718f | 0.95 | 1.19 | 1.63 | 1.10 | 57.71 <i>furB</i>  | Rmet_5746 | 23    | 50    | Q1LB71 | Ferric uptake regulator, Fur family                 |

|      |         |      |      |      |      |         |           |     |     |        |                                  |
|------|---------|------|------|------|------|---------|-----------|-----|-----|--------|----------------------------------|
| Rep2 | Op1718f | 1.03 | 1.05 | 1.80 | 0.99 | 13.23 - | Rmet_5747 | NeF | NeF | Q1LB70 | Putative membrane protein        |
| Rep2 | Op1719r | 0.86 | 0.94 | 1.25 | 0.94 | 2.87 -  | Rmet_5748 | NeF | NeF | Q1LB69 | Putative uncharacterized protein |
| Rep2 | Op1738f | 0.51 | 0.74 | 0.83 | 0.63 | 2.85 -  | Rmet_5780 | NeF | NeF | Q1LB37 | Putative uncharacterized protein |
| Rep2 | Op1738f | 0.61 | 1.08 | 1.05 | 0.87 | 2.14 -  | Rmet_5781 | NeF | NeF | Q1LB36 | Putative uncharacterized protein |
| Rep2 | Op1785r | 0.88 | 0.82 | 0.96 | 0.85 | 2.07 -  | Rmet_5890 | 100 | 37  | Q1LAS7 | Ferrous iron transport protein B |
| Rep2 | Op1785r | 1.03 | 0.81 | 1.12 | 0.83 | 2.08 -  | Rmet_5891 | 35  | 164 | Q1LAS6 | FeoA                             |

**VF3. Notregulated in Q(AE104:EDTA/Zn)**  
5255 genes
