# Supplementary material for: Characterization of the Δ7 Mutant of Cupriavidus metallidurans with Deletions of Seven Secondary Metal Uptake Systems
Source: PubMed Central journal article supplement (PMC5069749; doi:10.1128/msystems.00004-16), 2016-02-25
Supplement: sys001162005st2.pdf [file sys001162005st2.pdf]

**Supplementary Table S2. Regulation of *lacZ* fusions with genes that might be involved in zinc homeostasis<sup>a</sup>.**

| Gene                   | Condition          | Parent, -fold change |               |              |
|------------------------|--------------------|----------------------|---------------|--------------|
|                        |                    | AE104                | $\Delta zupT$ | $\Delta 7$   |
| Rmet_0837<br>4.83±0.11 | 0                  | 1.00                 | 1.26          | <b>0.42</b>  |
|                        | 10 $\mu$ M Cd(II)  | 0.82                 | 1.05          | <b>0.34</b>  |
|                        | 125 $\mu$ M Cd(II) | 1.10                 | 1.21          | 0.54         |
|                        | 10 $\mu$ M Co(II)  | 1.00                 | 1.08          | <b>0.27</b>  |
|                        | 125 $\mu$ M Co(II) | 0.87                 | 1.21          | <b>0.35</b>  |
|                        | 50 $\mu$ M EDTA    | 1.47                 | <b>3.14</b>   | 1.12         |
|                        | 1 mM EDTA          | <b>51.03</b>         | <b>50.85</b>  | <b>39.69</b> |
|                        | 10 $\mu$ M Zn(II)  | 0.97                 | 0.93          | <b>0.29</b>  |
|                        | 125 $\mu$ M Zn(II) | <b>5.61</b>          | <b>4.87</b>   | <b>2.18</b>  |
| Rmet_1098<br>1.20±0.16 | 0                  | 1.00                 | <b>3.70</b>   | n.d.         |
|                        | 10 $\mu$ M Cd(II)  | 1.43                 | <b>7.21</b>   | n.d.         |
|                        | 125 $\mu$ M Cd(II) | 1.04                 | <b>4.02</b>   | n.d.         |
|                        | 10 $\mu$ M Co(II)  | 0.89                 | <b>2.96</b>   | n.d.         |
|                        | 125 $\mu$ M Co(II) | 0.82                 | <b>2.83</b>   | n.d.         |
|                        | 50 $\mu$ M EDTA    | <b>20.34</b>         | <b>96.02</b>  | n.d.         |
|                        | 1 mM EDTA          | <b>66.09</b>         | <b>69.67</b>  | n.d.         |
|                        | 10 $\mu$ M Zn(II)  | 0.82                 | <b>2.61</b>   | n.d.         |
|                        | 125 $\mu$ M Zn(II) | 0.71                 | <b>3.31</b>   | n.d.         |
| Rmet_1106<br>6.41±0.08 | 0                  | 1.00                 | 0.65          | n.d.         |
|                        | 10 $\mu$ M Cd(II)  | 0.87                 | 0.56          | n.d.         |
|                        | 125 $\mu$ M Cd(II) | 0.66                 | <b>0.17</b>   | n.d.         |
|                        | 10 $\mu$ M Co(II)  | 1.12                 | 0.61          | n.d.         |
|                        | 125 $\mu$ M Co(II) | 0.93                 | <b>0.27</b>   | n.d.         |
|                        | 50 $\mu$ M EDTA    | 1.15                 | 0.59          | n.d.         |
|                        | 1 mM EDTA          | <b>4.07</b>          | 1.96          | n.d.         |
|                        | 10 $\mu$ M Zn(II)  | 1.06                 | 0.64          | n.d.         |
|                        | 125 $\mu$ M Zn(II) | 0.90                 | <b>0.23</b>   | n.d.         |
| Rmet_1114<br>26.2±2.5  | 0                  | 1.00                 | 0.71          | <b>0.50</b>  |
|                        | 10 $\mu$ M Cd(II)  | 0.82                 | 0.78          | 0.58         |
|                        | 125 $\mu$ M Cd(II) | 0.92                 | 0.82          | 0.54         |
|                        | 10 $\mu$ M Co(II)  | 0.94                 | 0.71          | <b>0.49</b>  |
|                        | 125 $\mu$ M Co(II) | 0.94                 | 0.87          | <b>0.47</b>  |
|                        | 50 $\mu$ M EDTA    | <b>3.17</b>          | <b>4.49</b>   | 1.21         |
|                        | 1 mM EDTA          | <b>7.11</b>          | <b>6.36</b>   | <b>4.43</b>  |
|                        | 10 $\mu$ M Zn(II)  | 0.80                 | 0.64          | <b>0.48</b>  |
|                        | 125 $\mu$ M Zn(II) | 1.07                 | 1.01          | 0.52         |

|           |               |               |              |              |
|-----------|---------------|---------------|--------------|--------------|
| Rmet_1794 | 0             | 1.00          | 0.82         | <b>0.44</b>  |
| 15.0±0.3  | 10 µM Cd(II)  | 0.85          | 0.84         | <b>0.37</b>  |
|           | 125 µM Cd(II) | 0.54          | 0.68         | <b>0.25</b>  |
|           | 10 µM Co(II)  | 0.78          | 0.80         | <b>0.34</b>  |
|           | 125 µM Co(II) | 0.64          | 0.66         | <b>0.29</b>  |
|           | 50 µM EDTA    | 0.90          | 0.95         | <b>0.43</b>  |
|           | 1 mM EDTA     | 0.95          | 1.01         | <b>0.30</b>  |
|           | 10 µM Zn(II)  | 1.05          | 0.90         | <b>0.40</b>  |
|           | 125 µM Zn(II) | 0.66          | 0.75         | <b>0.30</b>  |
| Rmet_1819 | 0             | 1.00          | <b>3.45</b>  | n.d.         |
| 1.49±0.04 | 10 µM Cd(II)  | 0.81          | <b>2.87</b>  | n.d.         |
|           | 125 µM Cd(II) | 1.26          | <b>2.59</b>  | n.d.         |
|           | 10 µM Co(II)  | 1.02          | <b>4.00</b>  | n.d.         |
|           | 125 µM Co(II) | 1.10          | <b>3.00</b>  | n.d.         |
|           | 50 µM EDTA    | 1.13          | <b>3.71</b>  | n.d.         |
|           | 1 mM EDTA     | <b>79.18</b>  | <b>54.51</b> | n.d.         |
|           | 10 µM Zn(II)  | 0.76          | <b>3.28</b>  | n.d.         |
|           | 125 µM Zn(II) | <b>3.28</b>   | <b>4.67</b>  | n.d.         |
| Rmet_3361 | 0             | 1.00          | 0.83         | 0.81         |
| 12.7±2.1  | 10 µM Cd(II)  | 0.81          | 0.71         | 0.78         |
|           | 125 µM Cd(II) | <b>0.43</b>   | <b>0.43</b>  | 0.89         |
|           | 10 µM Co(II)  | 0.86          | 0.74         | 0.73         |
|           | 125 µM Co(II) | 0.64          | 0.64         | 0.63         |
|           | 50 µM EDTA    | 0.97          | 0.88         | 0.83         |
|           | 1 mM EDTA     | 0.91          | 0.91         | 0.79         |
|           | 10 µM Zn(II)  | 0.69          | 0.73         | 0.83         |
|           | 125 µM Zn(II) | <b>0.47</b>   | <b>0.47</b>  | 0.65         |
| Rmet_5377 | 0             | 1.00          | <b>5.68</b>  | <b>0.66</b>  |
| 0.78±0.22 | 10 µM Cd(II)  | 1.25          | <b>5.18</b>  | n.d.         |
|           | 125 µM Cd(II) | 0.60          | 0.84         | <b>0.41</b>  |
|           | 10 µM Co(II)  | 0.80          | <b>4.89</b>  | n.d.         |
|           | 125 µM Co(II) | 0.79          | 1.51         | <b>0.50</b>  |
|           | 50 µM EDTA    | <b>5.30</b>   | <b>5.76</b>  | n.d.         |
|           | 1 mM EDTA     | <b>107.83</b> | <b>81.89</b> | <b>82.77</b> |
|           | 10 µM Zn(II)  | 1.14          | <b>3.50</b>  | n.d.         |
|           | 125 µM Zn(II) | <b>2.19</b>   | <b>2.12</b>  | <b>0.28</b>  |

|           |               |             |             |             |
|-----------|---------------|-------------|-------------|-------------|
| Rmet_5404 | 0             | 1.00        | 0.64        | 0.83        |
| 16.3±2.1  | 10 µM Cd(II)  | 0.76        | 0.50        | 0.61        |
|           | 125 µM Cd(II) | <b>0.47</b> | <b>0.49</b> | <b>0.49</b> |
|           | 10 µM Co(II)  | 0.89        | 0.59        | 0.79        |
|           | 125 µM Co(II) | 0.77        | 0.58        | 0.72        |
|           | 50 µM EDTA    | 0.80        | 0.68        | 0.73        |
|           | 1 mM EDTA     | 0.82        | 0.77        | 0.66        |
|           | 10 µM Zn(II)  | 0.71        | 0.55        | 0.70        |
|           | 125 µM Zn(II) | 0.57        | <b>0.48</b> | 0.59        |
| Rmet_5640 | 0             | 1.00        | 0.75        | 0.55        |
| 10.5±0.8  | 10 µM Cd(II)  | 0.84        | 0.70        | <b>0.46</b> |
|           | 125 µM Cd(II) | 0.61        | 0.81        | 0.61        |
|           | 10 µM Co(II)  | 0.90        | 0.62        | 0.55        |
|           | 125 µM Co(II) | 0.70        | 1.00        | 0.53        |
|           | 50 µM EDTA    | 1.02        | 0.93        | 0.63        |
|           | 1 mM EDTA     | <b>5.71</b> | <b>5.63</b> | <b>4.15</b> |
|           | 10 µM Zn(II)  | 0.84        | 0.63        | 0.51        |
|           | 125 µM Zn(II) | 1.46        | 1.67        | 0.66        |
| Rmet_5747 | 0             | 1.00        | 0.64        | n.d.        |
| 6.15±0.35 | 10 µM Cd(II)  | 0.98        | 0.59        | n.d.        |
|           | 125 µM Cd(II) | 0.82        | 0.69        | n.d.        |
|           | 10 µM Co(II)  | 1.06        | 0.72        | n.d.        |
|           | 125 µM Co(II) | 0.94        | 1.06        | n.d.        |
|           | 50 µM EDTA    | 1.06        | 1.07        | n.d.        |
|           | 1 mM EDTA     | <b>9.67</b> | <b>6.63</b> | n.d.        |
|           | 10 µM Zn(II)  | 1.14        | 0.51        | n.d.        |
|           | 125 µM Zn(II) | 1.85        | 1.21        | n.d.        |

<sup>a</sup>The values below the gene names are the specific activities in AE104 cells cultivated in TMM without further additions. All other values were divided by this basic activity. Red and bold-faced numbers indicate significant (D >1) down-regulations, green and bold-faced numbers significant up-regulations
