# Supplementary material for: Characterization of the Δ7 Mutant of Cupriavidus metallidurans with Deletions of Seven Secondary Metal Uptake Systems
Source: PubMed Central journal article supplement (PMC5069749; doi:10.1128/msystems.00004-16), 2016-02-25
Supplement: sys001162005st3.pdf [file sys001162005st3.pdf]

Supplementary Table S3. Primers and plasmids used.

| Name                    | 5'→3'-sequence                              | comment                           | work      |
|-------------------------|---------------------------------------------|-----------------------------------|-----------|
| MgtA lacZ1 SphI         | CAT GCA TGC-GCG GAT GAA ATG GCG CGA ACA GC  | LacZ primer <i>mgtA</i>           | this work |
| MgtA lacZ 2 XbaI        | GCC TCT AGA-ATT GCGACATGCGTTCAGGGCTT        | LacZ primer <i>mgtA</i>           | this work |
| MgtB lacZ1 SphI         | GAA GCA TGC-AGT CTG TTC CTG TGG GAA CTA TC  | LacZ primer <i>mgtB</i>           | this work |
| MgtB lacZ2 XbaI         | TCG TCT AGA-GGC AGA TTC AAT CGG CAG CCAG AC | LacZ primer <i>mgtB</i>           | this work |
| KO Rmet_5396_1 MunI     | AAA CAA TTG GAG TAC ATG CAG GCC TAC GA      | <i>cre-lox</i> primer <i>mgtA</i> | this work |
| KO Rmet_5396_4 AgeI     | AAA ACC GGT AGG CTG TAC GGC GAA TCG GT      | <i>cre-lox</i> primer <i>mgtA</i> | this work |
| KO Rmet_5396_3 ApaI     | AAA GGG CCC CCT GAA CGC ATG TCG CAA TC      | <i>cre-lox</i> primer <i>mgtA</i> | this work |
| KO Rmet_5396_2 NotI     | AAA GCG GCC GCC GGT ATC CGC TTC ACT CAT C   | <i>cre-lox</i> primer <i>mgtA</i> | this work |
| KO Rmet_2211_1 AgeI     | AAA ACC GGT ATG CGC CGT TGA CGG TGA CT      | <i>cre-lox</i> primer <i>mgtB</i> | this work |
| KO Rmet_2211_4 MunI     | AAA CAA TTG TGC CAT GTT GCG GAT CGT CT      | <i>cre-lox</i> primer <i>mgtB</i> | this work |
| KO Rmet_2211_2 ApaI     | AAA GGG CCC TCG GTG AGC GTG TGC CAG AT      | <i>cre-lox</i> primer <i>mgtB</i> | this work |
| KO Rmet_2211_3 NotI     | AAA GCG GCC GCT GGC TGC CGA TTG AAT CTG C   | <i>cre-lox</i> primer <i>mgtB</i> | this work |
| Rmet_5377 PstI Dis      | AAA CTG CAG CAG GCG CTC TTC CGC AAT C       | LacZ/Dis primer Rmet_5377         | this work |
| Rmet_5377 XbaI Dis      | AAA TCT AGA CAC CAG CGG CAC AAG CCA C       | LacZ/Dis primer Rmet_5377         | this work |
| Rmet_1819 PstI Dis      | AAA CTG CAG ACG GGC CTG CGT TAC AAC C       | LacZ/Dis primer Rmet_1819         | this work |
| Rmet_1819 XbaI Dis      | AAA TCT AGA GTC GCT GGC ACG GTA CTT G       | LacZ/Dis primer Rmet_1819         | this work |
| Rmet_1106 PstI Dis      | AAA CTG CAG CAT CGG CGC ATC TTC ACG G       | LacZ/Dis primer Rmet_1106         | this work |
| Rmet_1106 XbaI Dis      | AAA TCT AGA AGG GAG ACG GTG GCA TTG G       | LacZ/Dis primer Rmet_1106         | this work |
| Rmet_1114 PstI Dis      | AAA CTG CAG GGC CAC TTC GCA GCA TGT C       | LacZ/Dis primer Rmet_1104         | this work |
| Rmet_1114 XbaI Dis      | AAA TCT AGA CCA GCG GCG CAG CAT CAG         | LacZ/Dis primer Rmet_1104         | this work |
| Rmet_0837 PstI Dis      | AAA CTG CAG CAA GCG GGC GAA CCT GAA C       | LacZ/Dis/RT-PCR primer Rmet_0837  | this work |
| Rmet_0837 XbaI Dis      | AAA TCT AGA ATG GGC GTC GGT GAT GTC G       | LacZ/Dis/Rt-PCR primer Rmet_0837  | this work |
| Rmet_5404 PstI Dis      | AAA CTG CAG GCC GCC GAC GAT CTA TTT C       | LacZ/Dis primer Rmet_5404         | this work |
| Rmet_5404 XbaI Dis      | AAA TCT AGA CAG AAC CGC GGC CAG TTG         | LacZ/Dis primer Rmet_5404         | this work |
| Rmet_1098 PstI Dis      | AAA CTG CAG GGC CGC AGT CTC AAT GAG G       | LacZ/Dis/RT-PCR primer Rmet_1098  | (1)       |
| Rmet_1098 XbaI Dis      | AAA TCT AGA GGG CGC TTT CGA TGC TTC C       | LacZ/Dis/RT-PCR primer Rmet_1098  | (1)       |
| Rmet_5747 PstI Dis      | AAA CTG CAG GCC TCC GCC TCC GCA ATG         | LacZ/Dis primer Rmet_5747         | this work |
| Rmet_5747 XbaI Dis      | AAA TCT AGA CGT GCC AGC CGA CGA CAA C       | LacZ/Dis primer Rmet_5747         | this work |
| Rmet_5640 PstI Dis      | AAA CTG CAG CGC GAT CTG CCT GAT CGG         | LacZ/Dis/RT-PCR primer Rmet_5640  | this work |
| Rmet_5640 XbaI Dis      | AAA TCT AGA CTG GAC CTC GCC GTC TTC         | LacZ/Dis/RT-PCR primer Rmet_5640  | this work |
| Rmet_1794 PstI Dis      | AAA CTG CAG GTC GTG CTG ATC CGC AAG G       | LacZ/Dis/RT-PCR primer Rmet_1794  | this work |
| Rmet_1794 XbaI Dis      | AAA TCT AGA CAG TCC CGC TGG GCA AAT C       | LacZ/Dis/RT-PCR primer Rmet_1794  | this work |
| Rmet_3361 PstI Dis      | AAA CTG CAG CTG ACG CCA ATC GCA GTC G       | LacZ/Dis primer Rmet_3361         | this work |
| Rmet_3361 XbaI Dis      | AAA TCT AGA GCG CTG ACT CCG AAT ACC G       | LacZ/Dis primer Rmet_3361         | this work |
| rpoZRalme 28 up qPCR    | CTG AAA CAC ATC CCG AAC C                   | RT primer <i>rpoZ</i>             | (2)       |
| rpoZRalme 120 down qPCR | ACG GTG GGC TTG TCC TTT G                   | RT primer <i>rpoZ</i>             | (2)       |
| Rmet_5890 PstI Dis      | AAACTGCAGCACCCGCGCAGTTCGAGGAC               | RT primer Rmet_5890, <i>feoB</i>  | this work |
| Rmet_5890 XbaI Dis      | AAATCTAGAGGCCCGCGCTCATCATCAG                | RT primer Rmet_5890, <i>feoB</i>  | this work |
| qPCR hoxN2. up 1556     | TGG CAT CAA CGG GCT GTG GA                  | RT primer Rmet_1533, <i>hoxN</i>  | this work |
| qPCR hoxN2. down 1739   | TGA CGC ACA CCA CGG ACA GC                  | RT primer Rmet_1533, <i>hoxN</i>  | this work |

**Supplementary Table S3 cont.**

| Name            | Relevant markers | Description                                                          | TCDB (3) | Reference  |
|-----------------|------------------|----------------------------------------------------------------------|----------|------------|
| <u>Plasmids</u> |                  |                                                                      |          |            |
| pECD794-1       |                  | <i>lacZ</i> , derivate of pLO2                                       |          | (4)        |
| pCM157          |                  | Contains Cre recombinase                                             |          | (5)        |
| pECD1003        |                  | Mutant <i>lox</i> sites, derivate of pECD889                         |          | (4)        |
| pVDZ'2          |                  | Broad host range expression vector                                   |          | (6)        |
| pDNA130         |                  | pVDZ'2:: <i>czcCBAD'</i>                                             |          | (7)        |
| pECD1258        |                  | pECD1003 construct for <i>mgtB</i> deletion by <i>cre-lox</i> system |          | This study |
| pECD1259        |                  | pECD794 construct for <i>mgtA</i> disruption                         |          | This study |
| pECD1492        |                  | pECD794 construct for <i>mgtB</i> disruption                         |          | This study |
| pECD1488        |                  | pECD794 construct for <i>mgtA</i> LacZ Reporter gen                  |          | This study |
| pECD1489        |                  | pECD794 construct for <i>mgtB</i> LacZ Reporter gen                  |          | This study |
| pECD1205        |                  | pECD794 construct for Rmet_0837 LacZ/Disruption Reporter gen         |          | This study |
| pECD1204        |                  | pECD794 construct for Rmet_1098 LacZ/Disruption Reporter gen         |          | This study |
| pECD1210        |                  | pECD794 construct for Rmet_1106 LacZ/Disruption Reporter gen         |          | This study |
| pECD1208        |                  | pECD794 construct for Rmet_1114 LacZ/Disruption Reporter gen         |          | This study |
| pECD1207        |                  | pECD794 construct for Rmet_1794 LacZ/Disruption Reporter gen         |          | This study |
| pECD1203        |                  | pECD794 construct for Rmet_1819 LacZ/Disruption Reporter gen         |          | This study |
| pECD1213        |                  | pECD794 construct for Rmet_3361 LacZ/Disruption Reporter gen         |          | This study |
| pECD1202        |                  | pECD794 construct for Rmet_5377 LacZ/Disruption Reporter gen         |          | This study |
| pECD1211        |                  | pECD794 construct for Rmet_5404 LacZ/Disruption Reporter gen         |          | This study |
| pECD1206        |                  | pECD794 construct for Rmet_5640 LacZ/Disruption Reporter gen         |          | This study |
| pECD1209        |                  | pECD794 construct for Rmet_5747 LacZ/Disruption Reporter gen         |          | This study |

## References to the Supplementary Material

1. **Herzberg M, Schütttau M, Reimers M, Grosse C, Schlegel HG, and Nies DH.** 2015. Synthesis of nickel-iron hydrogenase in *Cupriavidus metallidurans* is controlled by metal-dependent silencing and un-silencing of genomic islands. *Metallomics* **7**:632 - 649.
2. **Große C, Friedrich S, and Nies DH.** 2007. Contribution of extracytoplasmic function sigma factors to transition metal homeostasis in *Cupriavidus metallidurans* strain CH34. *J Mol Microbiol Biotechnol* **12**:227-240.
3. **Saier MHJ, Tran CV, and Barabote RD.** 2006. TCDB: the Transporter Classification Database for membrane transport protein analyses and information. *Nucl Acid Res* **34**:D181-D186.
4. **Scherer J, and Nies DH.** 2009. CzcP is a novel efflux system contributing to transition metal resistance in *Cupriavidus metallidurans* CH34. *Mol Microbiol* **73**:601-621.
5. **Marx CJ, and Lidstrom ME.** 2002. Broad-host-range *cre-lox* system for antibiotic marker recycling in gram-negative bacteria. *Biotechniques*. **33**:1062-1067.
6. **Deretic V, Chandrasekharappa S, Gill JF, Chatterjee DK, and Chakrabarty A.** 1987. A set of cassettes and improved vectors for genetic and biochemical characterization of *Pseudomonas* genes. *Gene* **57**:61-72.
7. **Nies DH, Nies A, Chu L, and Silver S.** 1989. Expression and nucleotide sequence of a plasmid-determined divalent cation efflux system from *Alcaligenes eutrophus*. *Proc Natl Acad Sci U S A* **86**:7351-7355.
